27 **Abstract**

28 The animal gut microbiome has been implicated in a number of key biological processes, ranging  
29 from digestion to behavior, and has also been suggested to facilitate local adaptation. However, studies  
30 in wild animals rarely compare multiple populations that differ ecologically, which is the level at  
31 which local adaptation may occur. Further, few studies simultaneously characterize diet and the gut  
32 microbiome from the same sample, despite the likely presence of co-dependencies. Here, we  
33 investigate the interplay between diet and gut microbiome in three geographically isolated populations  
34 of the critically endangered Grauer's gorilla, which we show to be genetically differentiated. We find  
35 population- and social group-specific dietary and gut microbial profiles and co-variation between diet  
36 and gut microbiome, despite the presence of core microbial taxa. There was no detectable effect of  
37 age, sex, or genetic relatedness on the microbiome. Diet differed considerably across populations, with  
38 the high-altitude population consuming a lower diversity of plants compared to low-altitude  
39 populations, consistent with food plant availability constraining diet. The observed pattern of  
40 covariation between diet and gut microbiome is likely a result of long-term social and ecological  
41 factors. Our study suggests that the gut microbiome is sufficiently plastic to support flexible food  
42 selection and hence contribute to local adaptation.

43

44

45

46 **Keywords:** Metabarcoding, 16s rRNA, *trnL*, critically endangered, genetic diversity, fecal DNA

## 47 **Introduction**

48           The ranges of many species span ecologically diverse habitats that differ in abiotic and biotic  
49 factors, leading to some degree of adaptation to the predominant local condition. Our view of how  
50 organisms adapt has recently expanded beyond natural selection acting on morphological,  
51 physiological, and behavioral traits, to also include the contribution of associated microorganisms, the  
52 microbiome (Rosenberg & Zilber-Rosenberg, 2016). In animals, the microbiome plays a critical role  
53 in key biological processes such as digestion, health, behavior (Agranyoni et al., 2021; Colston &  
54 Jackson, 2016; Davidson et al., 2020; Ley et al., 2008; Moran et al., 2019), and has even been  
55 implicated in influencing host genomic evolution (Rudman et al., 2019).

56           The gut microbiome is shaped by numerous factors including host evolutionary relationships,  
57 social interactions, habitat, and diet (Archie & Tung, 2015; Rojas et al., 2021; Youngblut et al., 2019).  
58 In wild animals, distinct populations living under different ecological conditions have frequently been  
59 shown to possess unique gut microbiomes (Bueno de Mesquita et al., 2021; Couch et al., 2020; Uren  
60 Webster et al., 2018). Along with spatial differences, studies often show shifts in the gut microbiome  
61 concordant with seasonal dietary changes (Baniel et al., 2021; Bergmann et al., 2015; Guo et al., 2021;  
62 Hicks et al., 2018). Such differences are expected, as microorganisms, with their large population  
63 sizes, rapid evolution, and flexible community structure, are able to react quickly to changes in  
64 environmental conditions (Koskella et al., 2017), supporting their role in local adaptation of the host  
65 (Alberdi et al., 2016). Experimental studies have used dietary and gut microbial manipulations to  
66 dissect the directionality of the diet-microbiome link. They suggest a two-way connection. On the one  
67 hand, dietary manipulations alter the composition of the gut microbiome, permitting hosts to rapidly  
68 utilize new dietary sources (Reese et al., 2021). On the other hand, the gut microbiome itself can drive  
69 dietary choice (Trevelline & Kohl, 2022). In the wild, it is possible that the microbiome may impact  
70 dietary choices by modulating host behavior, for example, by constraining the selection to similar  
71 foods even in different habitats or by promoting dispersal decisions that reduce environmental change  
72 ('natal habitat-biased dispersal').

73           Here, we investigate spatial variation of the gut microbiome and its potential role in local  
74 dietary adaptation by jointly analyzing dietary and gut microbial diversity and composition in several  
75 isolated populations of the critically endangered Grauer's gorilla (*Gorilla beringei graueri*) (Plumptre  
76 et al., 2016). This gorilla subspecies is endemic to the eastern Democratic Republic of Congo (DRC).  
77 Our study populations occupy the ecological extremes of the species' range, approximated here by  
78 altitude (600 m above sea level [asl] and 2500 m asl). Grauer's gorillas are herbivores, consuming a  
79 large diversity of plants and plant parts (Yamagiwa et al., 2005). However, due to the political  
80 instability throughout their range, very little is known about ecology and diet of different populations  
81 (but see van der Hoek, Binyinyi, et al., 2021; van der Hoek, Pazo, et al., 2021).

82           Using fecal DNA metabarcoding combined with host genotyping, we first investigated  
83 whether isolated and genetically differentiated gorilla populations show dietary similarities. As plant  
84 communities differ considerably by altitude throughout the region (Imani et al., 2016), the presence of  
85 shared food taxa across populations would be indicative of restrictive dietary selection (a core  
86 Grauer's gorilla diet). If such a pattern of food selection occurs at least in part via gut microbial  
87 influence over host foraging, we also expect to find a conserved set of gut microbial taxa (a core  
88 microbiome). In contrast, if plasticity of the gut microbiome confers dietary flexibility, potentially  
89 facilitating local adaptation, we expect diet and the microbiome to differ significantly among  
90 populations, with strong covariation between them and little evidence for conserved dietary and  
91 microbial taxa.

92

## 93 **Materials & Methods**

94

### 95 *Ethics Statement*

96 This study was conducted in compliance with legal requirements of the DRC and the animal use  
97 policies of UC Davis. Data collection protocols were approved by Institut Congolais pour la  
98 Conservation de la Nature. Samples were collected non-invasively, without disturbing the animals.

99

### 100 *Sample collection*

101 Fecal samples (n=220) were opportunistically collected from Grauer's gorillas in eastern DRC  
102 between 2015 and 2018 at three sites: Kahuzi-Biega National Park (KBNP, 2.32°S, 28.72°E; KBNP;  
103 2500 m asl), Nkuba Conservation Area in Walikale territory, North Kivu (NCA, 1.38°S, 27.47°E;  
104 NCA; 600 m asl), and Maiko National Park (MNP, 0.87°S, 27.35°E; MNP; 830 m asl; **Figure 1**). In  
105 KBNP, gorillas in the Chimanuka group were habituated to human presence and samples were  
106 collected from identified individuals after observing defecation. All other samples were collected from  
107 night nests without knowledge of individual identity following the two-step collection method  
108 (Nsubuga et al., 2004). Geographic location and altitude were recorded using handheld GPS for all  
109 sampling sites except for the Mankoto group in KBNP, for which this information is missing. We  
110 assigned age classes in the field based on dung diameter, as follows: infant <4cm, sharing a nest with  
111 an adult; juvenile/subadult <5cm, own nest; and adults >5cm (McNeilage et al., 2006; Schaller, 1963).  
112 For the Chimanuka group, age classes of identified individuals were known from observations.

113

### 114 *DNA extraction*

115 Fecal samples were exported to Uppsala University, Sweden, for molecular analysis. DNA  
116 was extracted from 50 mg of dried material using the DNeasy PowerSoil DNA Extraction Kit  
117 (Qiagen) in a dedicated primate fecal extraction laboratory. We implemented the following  
118 modifications to the manufacturer's protocol: fecal samples were incubated under shaking (500 RPM)  
119 in the C1 solution overnight at 23°C. They were then transferred into a heating block and incubated at

120 65°C for 10 minutes, followed by bead beating on a vortex at maximum speed for 1 hour at room  
121 temperature. Incubation in C2 and C3 solution was on ice. We incubated the samples in C6 solution at  
122 room temperature for 5 minutes before elution.

123

#### 124 *Gorilla genotyping, individual identification, relatedness and population differentiation analyses*

125 We genotyped all 220 samples at 12 microsatellite loci (vWF, D1s550, D4s1627, D5s1457,  
126 D5s1470, D6s474, D6s1056, D7s817, D8s1106, D10s1432, D14s306, and D16s2624) following the  
127 two-step multiplex protocol (Arandjelovic et al., 2009) and sexed them with the amelogenin assay  
128 (Bradley et al., 2001). PCR products were run on an agarose gel to confirm amplification success and  
129 absence of contamination in blanks. Up to four loci were pooled, based on fluorophores and product  
130 sizes, and run on the ABI GeneAnalyzer (ThermoFisher Scientific). We scored genotypes manually in  
131 GeneMapper v5.0 (Chatterji & Pachter, 2006) and used Cervus v3.0.7 (Kalinowski et al., 2007) to  
132 identify individuals. Samples were considered to originate from the same individual if their genotypes  
133 matched at five or more loci without mismatches, with the probability of identity assuming full-sibling  
134 relationship (PID<sub>sib</sub>) less than 0.05. We manually generated consensus individual genotypes from  
135 matching samples, taking into account the time and place of sample collection, and evidence about the  
136 presence of other individuals from the same group.

137 We tested for deviations from Hardy-Weinberg equilibrium, heterozygote deficiency, and  
138 linkage disequilibrium at each locus in GenePop v4.7.5 (Raymond & Rousset, 1995; Rousset, 2008).  
139 Genetic population structure was assessed using STRUCTURE v2.3.4 (Porrás-Hurtado et al., 2013)  
140 with 20 independent runs for  $K = 1-11$  (corresponding to the eleven social groups), an 100,000-  
141 iteration burn-in, and data collection for 1,000,000 runs, assuming population admixture and  
142 correlated allele frequencies (Falush et al., 2003). Results from different runs of  $K$  were merged in  
143 CLUMPP (Jakobsson & Rosenberg, 2007; Kopelman et al., 2015), and analyzed and visualized in  
144 ‘pophelper’ in R (Francis, 2017; R Core Team, 2021). The most likely value of  $K$  was determined  
145 using  $\Delta K$  (Evanno et al., 2005). We used the ‘adegenet’ R package for Principle Component Analysis  
146 (PCA) based on individual genotypes (Jombart, 2008). Population differentiation statistics  $F_{ST}$  and  $F'_{ST}$

147 (Meirmans & Hedrick, 2011) were calculated in GenoDive v3.04 (Meirmans, 2020), and significance  
148 assessed with 9999 permutations. We compared genetic relatedness between populations and social  
149 groups using an AMOVA in the R package ‘poppr’ (Kamvar et al., 2014) and calculated pairwise  
150 relatedness ( $r$ ) between all individuals within KBNP and NCA separately in ML-Relate (Kalinowski et  
151 al., 2006).

152

### 153 *Characterization of gorilla diet*

154 We characterized the diet of 92 unique individuals identified by genotyping (see Results),  
155 from nine social groups and two lone silverbacks (**Table S1, S2**). We aimed to analyze a single nest  
156 site per group, but have also included individuals from additional nest sites of the same group if they  
157 were collected during the same year and season to maximize the number of studied individuals (**Table**  
158 **S2**). A single sample per individual was studied. The majority of our samples were collected during  
159 the dry season, but we also included some samples, social groups (Chimanuka) and one population  
160 (MNP) that were collected during the rainy season (**Table S2**). We present our analyses with and  
161 without these samples.

162 We amplified the P6 loop of the *trnL* chloroplast intron (Taberlet et al., 2007), a locus that has  
163 been successfully used for dietary metabarcoding in primates, and for which a large database of  
164 tropical plants is available (Mallott et al., 2018). We used the standard *trnL* g and h primers (**Table**  
165 **S3**), tagged with 96 eight-base-pair (bp) barcodes. Each barcode differed from all others at a minimum  
166 of three positions. DNA amplifications were carried out in 20  $\mu$ l reactions containing 2  $\mu$ l fecal DNA  
167 extract, 1 U Platinum II *Taq* Hot-Start DNA polymerase, 1x Platinum II Buffer, 0.2 mM each dNTP, 2  
168 mM MgCl<sub>2</sub>, and 1  $\mu$ M each primer. Each DNA sample was amplified twice. The duplicates were  
169 placed randomly on different PCR plates to avoid potential batch effects and biases due to cross-  
170 contamination of sample and/or barcoded primer (**Table S1**). We included one PCR negative and two  
171 to three empty wells per plate, to check for contamination during PCR (Taberlet et al., 2018). In  
172 addition, we included five DNA extraction blanks. PCR conditions consisted of 2 minutes  
173 denaturation at 94°C followed by 35 cycles of 94°C for 30 seconds, 51°C for 30 seconds, and 68°C for

174 15 seconds, without final extension. PCR products were checked on a 2% agarose gel to confirm  
175 amplification without contamination.

176 The barcoded PCR products were pooled column-wise (16  $\mu$ l for each sample, duplicates in  
177 separate pools), mixed with 640  $\mu$ l PB Buffer, and purified using MinElute columns (Qiagen, The  
178 Netherlands), eluting in 50  $\mu$ l EB buffer. Double-indexed next-generation sequencing libraries  
179 (Kircher et al., 2012) were prepared as detailed (Brealey et al., 2020; Rohland et al., 2015) but using  
180 not-barcoded incomplete adapters after blunt-end repair. Two library preparation blanks were carried  
181 through all steps. Each pool was quantified using qPCR with PreHyb primers (**Table S3**; Rohland et  
182 al., 2015) and amplification settings as in Brealey et al. (2020).

183 Each sample pool and both library blanks received a unique combination of indices (**Table**  
184 **S1**). For indexing PCR, we used the same reaction mixture and cycling conditions as Brealey et al.  
185 (2020). The number of cycles ranged from 8 to 10, depending on the copy number estimated from  
186 qPCR (**Table S1**). Library preparation blanks were amplified for 10 cycles to maximize capture of  
187 potential contaminants. We performed MinElute purification and quantified indexed pools with qPCR,  
188 as above, using *i7* and *i5* primers (Rohland et al., 2015, **Table S3**). Indexed sample pools were  
189 combined in equimolar amounts, except for library preparation blanks, of which we added 0.5  $\mu$ l each  
190 into the final pool, corresponding to the lowest amount added for any sample. The final sequencing  
191 pool was cleaned using AmPure XP beads (Beckman Coulter, USA) with two elutions (0.5x followed  
192 by 1.8x), which remove very large fragments and fragments <100bp, respectively. This size selection  
193 is optimized for the retention of *trnL* amplicons (~10-150bp in length + 148 bp of barcoded and  
194 indexed adapters). Elution was performed in 30  $\mu$ l of EB buffer. The cleaned library pool was  
195 quantified using both a Qubit High Sensitivity fluorometer and 2200 TapeStation and sequenced at the  
196 Uppsala Science for Life Laboratory on a single MiSeq lane with 150 bp paired-end sequencing with  
197 version 2 chemistry.

198 Sequence processing and analysis was done in OBITools v1.2.13 (Boyer et al., 2016). Paired  
199 reads with quality scores >40 and overlap >10 bp were retained and merged. Sample of origin for each  
200 read was established through its index and barcode, requiring an exact sequence match. Sequences



201 were clustered into molecular operational taxonomic units (MOTUs), each representing a unique plant  
202 taxon (Valentini et al., 2009). A large number of MOTUs had fewer than 10 sequences across all  
203 samples and were removed as recommended (e.g., Shehzad et al., 2012). We also removed sequences  
204 that differed by exactly one nucleotide from a more abundant sequence and had a total count less than  
205 5% of the more abundant sequence, following Boyer et al. (2016).

206 Finally, taxonomic assignment used a custom-made reference database (below). Based on a  
207 frequency plot of identity to the reference database (**Figure S1**) and similar *trnL*-based studies of  
208 tropical primate diet (e.g., Quéméré et al., 2013), we removed sequences below an identity threshold  
209 of 0.90. Below this, sequences were regarded as likely chimeric, enriched in sequencing or PCR  
210 errors. No singletons were present after this filtering step.

211

#### 212 *Compiling plant trnL reference database*

213 We built a local DNA barcoding reference library by downloading all 324,502 available  
214 sequences from NCBI GenBank using the search query: “(trnL[All Fields] OR complete genome[All  
215 Fields]) AND (plants[filter] AND (chloroplast[filter] OR plastid[filter]))” (last accessed 2 December  
216 2021). In OBITools v1.2.13, the sequence list was annotated with taxonomy information downloaded  
217 from NCBI (<ftp://ftp.ncbi.nih.gov/pub/taxonomy/taxdump.tar.gz>, last accessed 3 December 2021). To  
218 complete the database of *trnL* genes, we followed established protocol (Boyer et al., 2016), using the  
219 same *trnL* g-h primers as in the wet laboratory to extract *trnL* variants *in silico* in the program ecoPCR  
220 v2.1 (Ficetola et al., 2010). We kept sequences that were between 10 to 230 base pairs long with at  
221 most three primer mismatches total (Taberlet et al., 2018). The final database contained 21,308 *trnL in*  
222 *silico* amplicons, in 608 families and 5,662 genera.

223 To evaluate the resolution of our reference database with respect to local plant diversity, we  
224 compared plant taxa present in our database to a list of plants known to occur in the Kahuzi and  
225 Itebero regions of KBNP (Yumoto et al., 1994). To enable this comparison, we updated the taxonomic  
226 classification of the KBNP plant list (Yumoto et al., 1994) by searching for species names in the

227 Global Biodiversity Information Facility (GBIF). The updated list contained 328 taxa, in 81 unique  
228 families and 234 genera. Of these, all families and 77.4% of genera were present in our *trnL* database.

229

### 230 *Characterization of gorilla gut microbiome*

231 We characterized gut microbial composition in 70 individuals from KBNP and NCA  
232 populations using a single sample per individual (**Table S2**). We selected the same sample that was  
233 used for dietary analyses and only dry season samples from the Bansamba group in NCA. To quantify  
234 possible contamination, we also carried nine random extraction blanks through the entire data  
235 generation process.

236 The V4 region of the *16S rRNA* gene was amplified with primers 515F/806R (**Table S3**) for  
237 each sample in duplicate. The PCR reaction contained 2  $\mu$ l of extracted DNA, 5  $\mu$ M each of the  
238 forward and reverse primer, 1x Phusion High-Fidelity Buffer, 0.02 units Phusion HF DNA polymerase  
239 (2U/ $\mu$ l), 0.012 mg DMSO and 0.05  $\mu$ M (each) dNTPs, with the volume made up to 20  $\mu$ l with  
240 Ultrapure H<sub>2</sub>O. Thermal cycling conditions were as follows: 30 seconds at 98°C, 25 cycles of 98°C  
241 for 10 seconds, 52°C for 20 seconds and 72°C for 20 seconds, and 10 minutes at 72°C. PCR cycles  
242 were limited to 25 to minimize the risk of unspecified products and chimeras. Duplicate reactions were  
243 pooled and cleaned with AmPure beads (Qiagen).

244 Next-generation sequencing libraries were prepared from PCR products following the double-  
245 barcoding, double-indexing strategy (Kircher et al., 2012; Meyer & Kircher, 2010; Rohland et al.,  
246 2015; van der Valk et al., 2017). As a result, each sample had a unique combination of two barcodes  
247 and two indices, which enabled bioinformatic filtering of potential chimeric molecules and  
248 misassigned reads resulting from index hopping (van der Valk et al., 2017, 2020). For indexing, we  
249 determined the suitable number of PCR cycles (8-11) based on qPCR of barcoded libraries, as above.  
250 Indexed libraries were quantified by qPCR and pooled in equimolar amounts for sequencing on a  
251 single MiSeq lane, using version 2 chemistry and 250 bp paired end sequencing at the Uppsala  
252 Science for Life Laboratory sequencing facility.

253 Sequencing reads were demultiplexed and adapters removed using a Python script (Brealey et  
254 al., 2021). We followed established protocol to estimate microbial amplicon sequence variants (ASVs)  
255 using DADA2 (Callahan et al., 2016), rather than clustering sequences, which avoids biases due to  
256 arbitrary similarity thresholds (Edgar, 2018). Forward and reverse reads were truncated to 200 and 150  
257 bp, respectively, at which point read quality scores dropped below 35. We merged paired-end reads,  
258 requiring an overlap of at least 12 bp, and removed sequences outside the 250-256 bp range and those  
259 with any barcode mismatch, as recommended (Callahan et al., 2016).

260 Taxonomy was assigned using the SILVA 132 reference database, released in December 2017  
261 (Quast et al., 2012). Species-level assignment required a strict 100% match (Edgar, 2018). We  
262 removed singletons and ASVs labeled ‘Unassigned’, ‘Eukaryota’, ‘mitochondria’, or ‘chloroplast’.  
263 We retained Archaea, although archaeal amplification from the V4 region of the *16S rRNA* is limited  
264 (Raymann et al., 2017), because within-dataset comparisons are nonetheless informative. We built a  
265 bacterial phylogenetic tree by aligning sequences to the Greengenes 13\_5 mega-phylogeny (203,452  
266 99% OTUs; DeSantis et al., 2006) in SEPP using default parameters (Mirarab et al., 2012).

267

#### 268 *Statistical analyses of trnL and 16S datasets*

269 To examine dietary and microbiome diversity, we analyzed the *trnL* and *16S rRNA*  
270 metabarcoding datasets, after first filtering out rare sequence variants below 0.5% relative abundance  
271 in at least one sample, as suggested (Deagle et al., 2019). We evaluated sampling effort and  
272 sequencing depth accumulation curves in the R packages ‘vegan’ (Oksanen et al., 2020) and  
273 ‘ranacapa’ (Kandlikar et al., 2018), respectively. We checked whether the predicted number of taxa  
274 (asymptote of the sequencing accumulation curve) minus actual number of taxa (richness) related to  
275 any of the considered biological variables or sequencing depth (read count) using a generalized linear  
276 model (GLM) with quasi-Poisson error distribution in the R package ‘lme4’ (Bates et al., 2015).

277 We calculated two alpha diversity metrics for each dataset: richness, or the number of taxa,  
278 and Shannon’s diversity index, or evenness (Chao et al., 2014). As recommended by McMurdie &  
279 Holmes (2013), we did not rarefy to minimum sequencing depth. To test the effects of population,

280 social group, altitude, sex, and age class on diversity metrics, we fitted a GLM with quasi-Poisson (for  
281 richness) or gamma (for evenness) error distribution with logit link function, followed by Tukey  
282 honestly significant difference (HSD) *post-hoc* comparisons between levels of categorical variables  
283 that were overall significant ( $\chi^2$  test with Bonferroni correction) (Lenth et al., 2021).

284 To assess trends in diet and microbiome beta diversity, or composition, we followed a strategy  
285 designed for the compositional nature of metabarcoding data (Gloor et al., 2017; Weiss et al., 2017).  
286 We used Bayesian multiplicative zero replacement and then centered and log-ratio (CLR) transformed  
287 each dataset using the R packages ‘zcompositions’ (Palarea-Albaladejo & Martín-Fernández, 2015)  
288 and ‘compositions’ (van den Boogaart & Tolosana-Delgado, 2008). For the microbiome dataset, we  
289 secondarily used Phylogenetic Isometric Log-Ratio Transform (phILR) to compute compositional  
290 abundance at phylogenetic balances (Silverman et al., 2017). To evaluate variation in composition of  
291 diet and microbiome, we computed Aitchison’s dissimilarity (Euclidean distance between CLR  
292 values) (Aitchison et al., 2000). To quantitatively estimate which factors best predict variation in diet  
293 and gut microbiome, we modeled the composition in CLR (or phILR) transformed space as a function  
294 of ecological and biological variables using PERMANOVA, via function *adonis2* in ‘vegan’  
295 (Anderson & Walsh, 2013). The predictor variables were population, social group, sex, age class, and  
296 altitude. Sequencing read count was kept as the first predictor, even if  $p > 0.05$ . *Post-hoc* comparisons  
297 between levels of overall significant variables were done with Bonferroni correction using  
298 ‘pairwiseAdonis’ (Arbizu, 2020). The influence of genetic distance ( $I$  - genetic relatedness) was  
299 modeled separately within each population using Mantel and partial Mantel tests (controlling for  
300 social group identity).

301 We estimated the covariance between diet and microbiome using a co-inertia analysis between  
302 the two matrices in the package ‘omicade4’ and calculated the RV coefficient (Escoufier, 1973;  
303 Robert & Escoufier, 1976) and its significance using a Monte Carlo test with 999 permutations (Meng  
304 et al., 2014). To compare the effects of diet and other variables on the gut microbiome, we fit a  
305 Multiple Regression on Matrices (MRM) model (Lichstein, 2007), an extension of the partial Mantel  
306 test, in ‘ecodist’ (Goslee & Urban, 2007). The explanatory variables were straight-line geographic

307 distance, altitude difference, diet composition (Aitchison distance), and social group and population as  
308 binary (same, 0, or different, 1). Significance was assessed using 999 permutations of the response  
309 variable, the Aitchison distance matrix of gut microbiome composition.

310 Differences in beta diversity can be due to differential abundance of a few key organisms, or  
311 subtle differences across an entire community. To identify dietary and microbial taxa that may have  
312 driven compositional differences, we used the R package ‘ALDEx2’ and focused on significant  
313 differences (Wilcoxon rank sum test with correction for false discovery rate (FDR)  $p < 0.05$ ) with  
314 effect sizes  $>1$ , as recommended (Gloor et al., 2017).

315

316

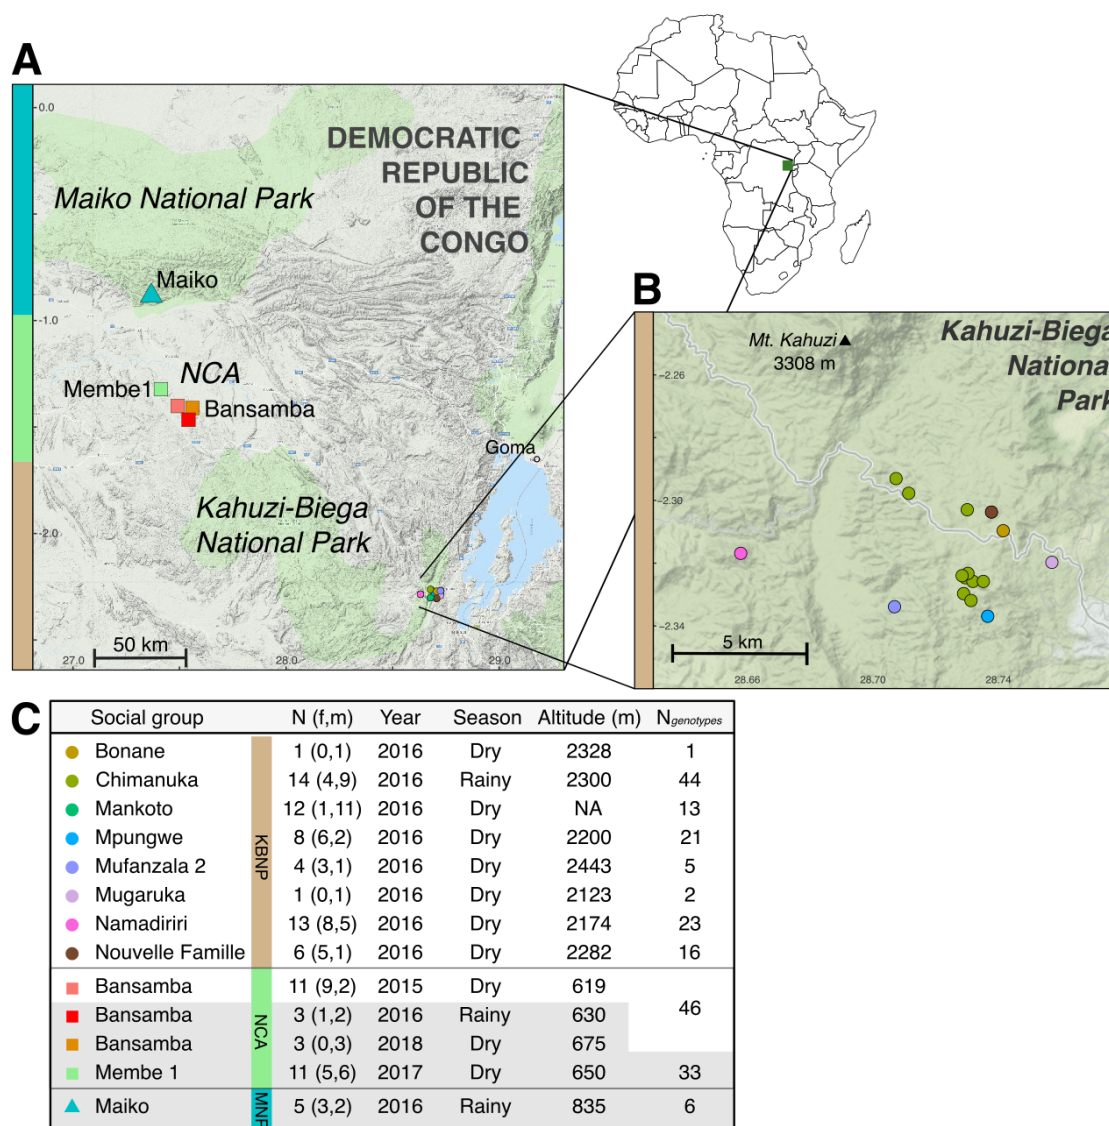

317  
 318 **Figure 1.** (A) Map of Grauer's gorilla fecal sampling locations from Maiko National Park (MNP; designated with cyan on  
 319 the left-hand side of the map), Nkuba Conservation Area (NCA; green) and Kahuzi-Biega National Park (KBNP; brown),  
 320 with (B) inset zooming in on different social groups in KBNP. Circle colors designate social groups, coded as in (C). Note  
 321 that multiple circles are present for the Chimanuka group, consistent with opportunistic sampling of identified individuals.  
 322 Geographic coordinates were not available for the Mankoto group. The table in (C) shows the sample size (N=number of  
 323 unique individuals, f=number of females, m=number of males) used for dietary and gut microbiome characterization of each  
 324 social group. Only diet but not gut microbiome data is available for samples shaded in gray. Bansamba group (NCA) was  
 325 sampled repeatedly, but only few samples were included in dietary analyses in later years (three from 2016 and three from  
 326 2018). Also shown for each social group are: collection year and season, altitude, and  $N_{genotypes}$  the total number of successfully  
 327 genotyped samples.  
 328

## 329 **Results**

### 330 ***Study populations of Grauer's gorillas are genetically differentiated***

331 We identified 92 unique individuals in the three study populations by microsatellite  
332 genotyping: 59 in KBNP, 28 in NCA, and 5 in MNP (**Figure 1, Table S2**). Individuals belonged to six  
333 different social groups and two solitary adult males (lone silverbacks) in KBNP, two social groups in  
334 NCA, and one group in MNP. Genotyping revealed that each individual was sampled 1-13 times, with  
335 4-17 individuals per social group.

336 None of the 12 microsatellite loci deviated from Hardy-Weinberg equilibrium after Bonferroni  
337 correction for multiple testing ( $p > 0.1$ ). On average, there were 6.1 alleles per locus (**Table S2**). The  
338 average observed and expected heterozygosities were 0.66 and 0.68, respectively. The test for global  
339 heterozygote deficiency was not significant overall ( $p = 0.6$ ) or in any population ( $p > 0.4$ ). The test  
340 for genotypic linkage disequilibrium using log likelihood ratio statistic with 66 pairwise comparisons  
341 between the 12 loci was not significant for any pair ( $p > 0.1$ ). Thus, we assumed linkage equilibrium  
342 and considered all loci in further analyses.

343 Analysis of the three populations using STRUCTURE (Porrás-Hurtado et al., 2013) revealed  
344 two distinct genetic groups (optimal  $K=2$  according to  $\Delta K$ ; Evanno et al., 2005; **Figure S2**). The  
345 clusters differentiated gorillas in high-altitude KBNP (2500 m asl) from those in low-altitude NCA  
346 and MNP (600-830 m asl) (**Figure S3**), consistent with the PCA (**Figure 2A**). All three populations  
347 were significantly differentiated from one another ( $F'_{ST} = 0.26-0.45$ ;  $p < 0.001$ ; **Table S4A**), with  
348 largest differences between MNP and KBNP, which are furthest apart geographically (215km).  
349 Individuals within social groups were more closely related than individuals in different groups in the  
350 same population (AMOVA  $\phi = 0.12$ ,  $p < 0.001$ ; **Table S4B**), consistent with gorilla social structure  
351 (Harcourt & Stewart, 2013).

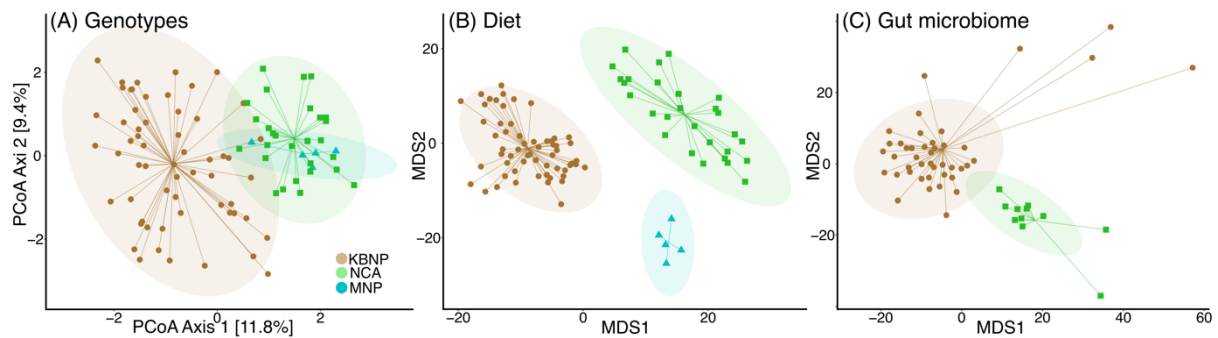

352  
353  
354 **Figure 2. (A)** PCA of genetic distances among individuals based on microsatellites. NMDS of **(B)** dietary  
355 composition and **(C)** gut microbiome composition, both in Aitchison distances. Individual samples are coloured by  
356 population of origin, with 95% confidence interval ellipses for each population (brown = KBNP, green = NCA, cyan  
357 = MNP, as in Figure 1).  
358

### 359 *Negative controls in trnL and 16S rRNA metabarcoding*

360 To quantify contamination in the diet (*trnL*) and the gut microbiome (*16S rRNA*) dataset, we  
361 analyzed DNA extraction blanks, PCR negative controls, unused barcode combinations and library  
362 preparation negative controls (for diet) (**Table S2**; **Table S5**; **Table S6**). In the diet dataset, the  
363 extraction and PCR negative controls contained 16 *trnL* reads in total, identified to 12 different plant  
364 taxa. Each taxon had one to three reads summed across all negative controls, yet up to 3,620-154,357  
365 reads per sample (**Table S5**). There were no reads with unused barcode combinations, suggesting that  
366 cross-contamination of barcodes during PCR and library preparation was negligible. In the  
367 microbiome dataset, four extraction blanks had 90 reads in total, whereas the remaining five had none  
368 (**Table S6**). These mapped to eight different *16S* taxa, with three to 26 reads each. As with the diet  
369 data, these taxa were among the most abundant in the samples (up to 2,244-14,307 reads per sample).  
370 This pattern is consistent with low-level cross-contamination from high quantity into low quantity  
371 samples typical for large-scale sequencing studies (Eisenhofer et al., 2019).  
372

### 373 *Diet of Grauer's gorillas*

374 We characterized the diet of 92 Grauer's gorilla individuals (**Table 1C**) using the chloroplast  
375 *trnL P6 loop* locus. After data filtering, we retained 5,367,160 *trnL* sequencing reads (corresponding  
376 to 45% of raw reads) belonging to 120 unique taxa (**Table S7A**). PCR replicates were more similar to



377 each other than to other samples in alpha and beta diversity ( $p < 0.001$ , **Figure S4**), and hence their  
378 sequencing data were pooled. Sample size and sequencing depth were sufficient to capture dietary  
379 diversity in KBNP and NCA, but not in MNP, where only five individuals were sampled  
380 (**Supplemental Text, Figure S5**).

381         Of the 120 detected dietary plant taxa, 115 could be identified to at least the order level (in 29  
382 different orders), 110 to family (in 49 families), and 44 to genus (in 35 genera) level (**Table S8**). All  
383 but 21 taxa have previously been recorded in the Grauer's gorilla diet in KBNP, NCA, and Mt.  
384 Tshiaberimu (Kambale, 2018; van der Hoek, Pazo, et al., 2021; Yamagiwa et al., 1994, 2005; Yumoto  
385 et al., 1994; **Table S8, columns S-T; Figure S6**). These 21 taxa are, however, present in the region  
386 (Spira et al., 2018).

387         Each Grauer's gorilla fecal sample contained 36 – 80 *trnL* taxa (mean  $58.52 \pm 10.83$ ) (**Figure**  
388 **3A**), with each population showing a different set of most abundant and prevalent plants (**Table 1;**  
389 **Table S8**). Five plant taxa were found in each sample collected during the dry season in KBNP and  
390 NCA, even though they showed very low abundance in some samples (0.1%). Only two plant taxa had  
391 abundances over 1% in all three populations (**Table 1**).

392

393 **Table 1.** Top three most abundant plant taxa by population and taxa shared across populations.

| ID  | NCBI- based finest taxonomic identity | Distribution-refined probable identity                        | Mean abundance in KBNP | Mean abund in NCA | Mean abund in MNP | KBNP Rank§ | NCA Rank§ | MNP Rank§ |
|-----|---------------------------------------|---------------------------------------------------------------|------------------------|-------------------|-------------------|------------|-----------|-----------|
| 1   | <i>Urera</i> sp.                      | <i>Urera hypselodendron</i>                                   | 35.1%                  | 0.2%              | 0.1%              | 1          | 14        | 19        |
| 2   | Apocynaceae sp.                       | <i>Taccazea apiculata</i>                                     | 21.0%                  | 0.2%              | 0.2%              | 2          | 16        | 17        |
| 6   | Urticaceae sp.                        | Urticaceae sp.                                                | 6.0%                   | 12.9%             | 0.06%             | 3          | 13        | 22        |
| 8   | Myristicaceae sp.                     | <i>Pycnanthus</i> , <i>Staudtia</i> , or <i>Afradisia</i> sp. | 0.05%                  | 14.5%             | 8.1%              | 13         | 1         | 5         |
| 5†  | Apocynoideae sp.                      | <i>Baijsea</i> , <i>Funtumia</i> , or <i>Motandra</i> sp.     | 4.6%                   | 8.9%              | 14.7%             | 4          | 2         | 3         |
| 25  | <i>Megaphrynium macrostachyum</i>     | <i>Megaphrynium macrostachyum</i>                             | 0.01%                  | 3.4%              | 0.05%             | 25         | 3         | 26        |
| 31  | Phyllanthaceae sp.                    | Phyllanthaceae sp.                                            | 0.01%                  | 0.01%             | 18.8%             | 46         | 63        | 1         |
| 32  | Alafinae sp.                          | <i>Strophanthus</i> sp.                                       | 0.02%                  | 0.2%              | 12.9%             | 29         | 26        | 2         |
| 14† | <i>Ficus</i> sp.                      | <i>Ficus</i> sp.                                              | 2.7%                   | 5.6%              | 1.9%              | 8          | 6         | 14        |
| 13‡ | Moraceae sp.                          | Moraceae sp.                                                  | 1.8%                   | 3.9%              | 0.07%             | 10         | 4         | 21        |

394 †Taxon greater than 1% relative abundance in all three populations (identifiable also by similar, high rank).  
 395 Shaded rows highlight taxa present in every sample collected during the dry season. With the exception of Moraceae sp. (ID  
 396 13<sup>‡</sup>), these taxa were also present in each rainy season sample and hence the abundances are shown including samples  
 397 collected during the rainy season. Moraceae sp. (ID 13<sup>‡</sup>) was missing from one individual in the Chimánuka group (KBNP)  
 398 collected during the rainy season.  
 399 §Rank is calculated by ranking each taxon by its relative abundance in a sample and calculating its mean rank across all  
 400 samples in a population. It thus reflects the average abundance rank of a given taxon across all samples in a population.  
 401

402 **Geography, altitude, and social group identity influence dietary diversity and composition in**  
 403 **Grauer's gorillas**

404 Dietary richness and evenness differed significantly by population and social group identity ( $p$   
 405  $< 0.001$ , **Table S9**). Both richness and evenness were significantly higher in low altitude populations  
 406 (NCA and MNP) than in high-altitude KBNP (mean richness:  $66.8 \pm 7.5$  taxa in MNP,  $65.6 \pm 6.1$  in  
 407 NCA vs.  $54.5 \pm 10.4$  in KBNP,  $p < 0.001$ ; evenness:  $10.0 \pm 1.3$  in MNP,  $8.4 \pm 2.5$  in NCA, vs.  $5.4 \pm 2.6$  in  
 408 KBNP,  $p < 0.001$ ; **Figure S7**). Altitude was also a significant predictor of dietary richness and  
 409 evenness in KBNP ( $p < 0.001$ ; **Figure S8**). In contrast, neither individual's sex nor age (age class  
 410 available for 70 individuals) had an effect on dietary richness or evenness ( $p > 0.3$ ; **Table S9**). We  
 411 obtained qualitatively similar results when analyzing only samples collected during the dry season

412 (excluding Chimanuka group, three individuals from Bansamba group, and MNP; **Table S9**), with the  
413 exception that dietary richness did not significantly change with altitude in KBNP ( $p = 0.2$ ).

414 Hierarchical clustering of dietary composition first separated high altitude (KBNP) from low  
415 altitude (NCA and MNP) locations (**Figure 3B**), even though MNP samples were collected during the  
416 rainy season. Within populations, individuals clustered by social group. NMDS ordination showed a  
417 similar pattern (**Figure 2B**). After accounting for sequencing depth, dietary composition was  
418 significantly influenced by population ( $p < 0.001$ , explaining 27.9% of the variance) and social group  
419 ( $p < 0.001$ , explaining an additional 21.6%) but not by sex ( $p = 0.7$ ) or age ( $p = 0.2$ ; **Table 2**). All  
420 social groups differed significantly from each other ( $p < 0.05$ ; **Table 2**), except for some comparisons  
421 involving the Mufanzala2 group, which had a small sample size ( $n=4$ ). Restricting the analysis to two  
422 similarly sized social groups in NCA and KBNP collected during the dry season, we confirmed the  
423 presence of significant between-group and between-population diet differences (**Table S10**),  
424 supporting the notion that populations and social groups have distinct diets and that our results are not  
425 driven by differences in sample size or season.

426 Using ALDEx2, we identified differentially abundant dietary items across populations. The  
427 drivers of the observed population dietary differences were among the most abundant taxa in each  
428 population (**Table 1**), most of which were absent or present at very low abundance in other  
429 populations (**Figure 3C**; **Table S11**). Out of the 21 previously undescribed food items (see above), 13  
430 were significantly more abundant in low-altitude populations compared to the high-altitude population  
431 KBNP (**Table S8, S9**; **Figure S6**). Within populations, each social group consumed between two and  
432 32 differentially abundant taxa (mean =  $11.3 \pm 11.6$ ).

433

434

435 **Table 2.** PERMANOVA model of factors influencing dietary composition

| Variable     | Df | R <sup>2</sup> | F     | p      | Post-hoc tests                                                                                                                                                                                                                                                                                                                                                                                                |                                                                                                                      |
|--------------|----|----------------|-------|--------|---------------------------------------------------------------------------------------------------------------------------------------------------------------------------------------------------------------------------------------------------------------------------------------------------------------------------------------------------------------------------------------------------------------|----------------------------------------------------------------------------------------------------------------------|
|              |    |                |       |        | Significant pairwise comparisons                                                                                                                                                                                                                                                                                                                                                                              | p <sub>Bonferroni</sub>                                                                                              |
| Read Count   | 1  | 0.01           | 1.73  | 0.05   | –                                                                                                                                                                                                                                                                                                                                                                                                             |                                                                                                                      |
| Population   | 2  | 0.279          | 17.80 | <0.001 | NCA – KBNP<br>KBNP – MNP‡<br>MNP – NCA                                                                                                                                                                                                                                                                                                                                                                        | < 0.001<br>< 0.001<br>< 0.001                                                                                        |
| Social Group | 6  | 0.216          | 4.56  | <0.001 | <b>KBNP</b><br>Chimanuka‡ – Nouvelle Famille<br>Chimanuka‡ – Mankoto<br>Chimanuka‡ – Mpungwe<br>Chimanuka‡ - Mufanzala2<br>Chimanuka‡ – Namadiriri<br>Nouvelle Famille – Mankoto<br>Nouvelle Famille – Mpungwe<br>Nouvelle Famille – Namadiriri<br>Mankoto – Mpungwe<br>Mankoto - Mufanzala2<br>Mankoto – Namadiriri<br>Mpungwe – Namadiriri<br>Mufanzala2 – Namadiriri<br><b>NCA</b><br>Membe1 – Bansamba(‡) | 0.02<br>0.005<br>0.005<br>0.02<br>0.005<br>0.02<br>0.02<br>0.005<br>0.005<br>0.03<br>0.005<br>0.005<br>0.02<br>0.005 |
| Sex          | 1  | 0.005          | 0.82  | 0.6    | –                                                                                                                                                                                                                                                                                                                                                                                                             |                                                                                                                      |
| Age class†   | 2  | 0.022          | 1.28  | 0.1    | –                                                                                                                                                                                                                                                                                                                                                                                                             |                                                                                                                      |

436 †Age class (Infants (N=7), Juveniles/subadults (N=21), Adults (N=42)) was modeled separately using a reduced dataset, since only 70 of the  
437 92 samples had age estimates. In this model the other predictor variables had estimates similar to those of the complete dataset.

438 ‡Samples from MNP, Chimanuka group in KBNP, and three out of 17 individuals from Bansamba group in NCA were collected during the  
439 rainy season, whereas all other samples were collected during the dry season. Removal of these individuals did not affect results (Table  
440 S10).

441

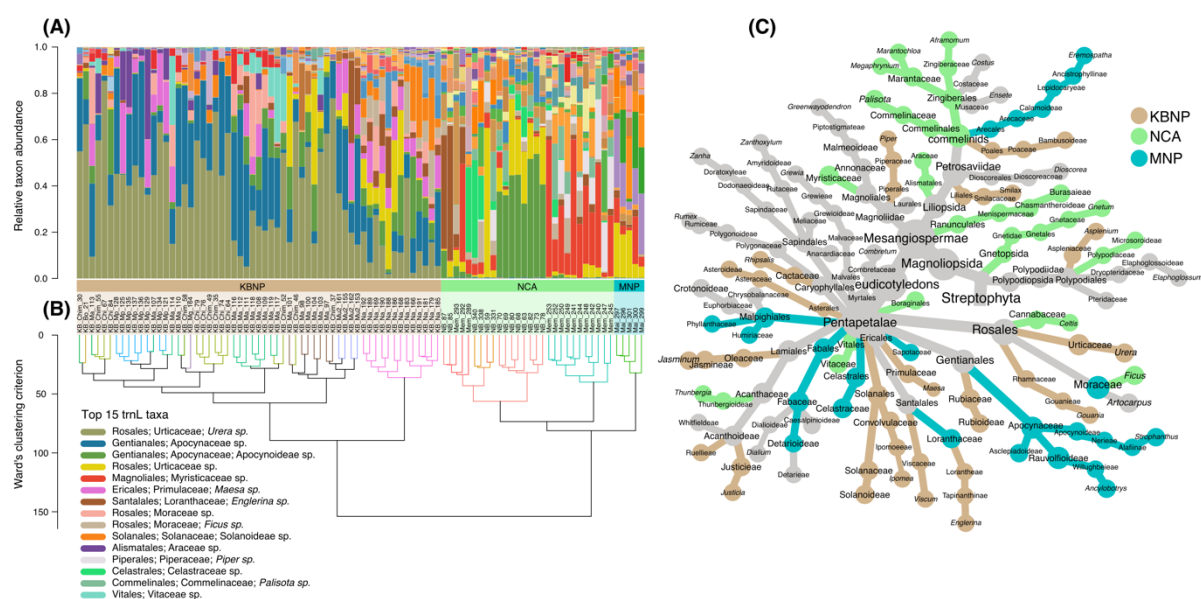

442 **Figure 3. (A)** Plants consumed by Grauer's gorillas in KBNP, NCA, and MNP. The 15 most abundant taxa across all  
 443 samples are shown. Populations are designated with coloured bars below (MNP cyan, NCA green, KBNP brown). **(B)**  
 444 Hierarchical cluster dendrogram of Ward's sum of squares based on minimum variance of squared dissimilarities (Murtagh  
 445 & Legendre, 2014) of centered-log-ratio (CLR) transformed taxon abundance. Branches are colored by social group,  
 446 following the code in Figure 1. **(C)** Plant taxa in Grauer's gorilla diet, coloured by the population in which they are  
 447 significantly more abundant (ALDEx2 Wilcoxon test  $p < 0.05$ ). For taxa that differ between two or more population pairs,  
 448 the color corresponds to the population with greatest effect size. Gray taxa do not differ significantly in abundance between  
 449 populations. Branch lengths do not reflect phylogenetic distance. Diagram generated with the 'metacoder' package in R  
 450 (Foster et al., 2017).  
 451  
 452

### 453 *Gut microbiome of Grauer's gorillas in Kahuzi-Biega National Park and Nkuba Conservation Area*

454 We characterized *16S rRNA* diversity in 70 individuals for which we also had dietary data  
 455 (**Figure 1C**; **Table S2**), using the same samples as for diet. Two samples had low read counts (5 and  
 456 348, compared to the mean of  $43,611 \pm 11,357$  in other samples) and were excluded. Our final dataset  
 457 consisted of 68 unique individuals and contained 2,965,516 reads in 417 unique microbial taxa (**Table**  
 458 **S12**).

459 The sample accumulation analyses suggested that additional sampling of feces from more  
 460 individuals could uncover novel gut commensals at the population level (**Figure S9A**). However, per  
 461 sample sequencing depth was sufficient to obtain a good representation of host microbiome diversity  
 462 (**Figure S9B**). We detected 16 different phyla and 48 different families of microorganisms in the gut  
 463 microbiome of Grauer's gorillas. All taxa were identified at least to the family level, 309 taxa to the  
 464 genus and 17 to the species level (**Table S12**). None were closely related to dominant soil

465 microorganisms (Delgado-Baquerizo et al., 2018). There were seven Archaea in our dataset, belonging  
 466 to the Methanomethylphilaceae and Methanobacteriaceae families. Each fecal sample contained on  
 467 average  $200.29 \pm 19.6$  taxa (min = 160, max = 237), each with average abundance of  $0.2\% \pm 0.4\%$ .  
 468 Eleven taxa were present in every individual gorilla fecal sample from both populations (the core gut  
 469 microbiome), however, populations differed in the most abundant taxa (**Table 3**).

470

471 **Table 3.** Top three most abundant gut microbiome taxa by population and taxa shared across  
 472 populations.

| ASV  | NCBI-based finest taxonomic identity                                                                      | Mean abundance in KBNP | Mean abund NCA | Rank KBNP§ | Rank NCA§ |
|------|-----------------------------------------------------------------------------------------------------------|------------------------|----------------|------------|-----------|
| 3†   | Bacteria; Firmicutes; Clostridia; Clostridiales; Family XIII; <i>AD3011 group</i>                         | 2.40%                  | 2.49%          | 1          | 3         |
| 6†   | Bacteria; Firmicutes; Erysipelotrichia; Erysipelotrichales; Erysipelotrichaceae; <i>UCG-004</i>           | 2.32%                  | 1.16%          | 2          | 17        |
| 4    | Bacteria; Firmicutes; Clostridia; Clostridiales; Ruminococcaceae; <i>Faecalibacterium</i>                 | 2.78%                  | 0.84%          | 3          | 39        |
| 5†   | Bacteria; Bacteroidetes; Bacteroidia; Bacteroidales; Rikenellaceae; <i>RC9 gut group</i>                  | 1.61%                  | 6.36%          | 7          | 1         |
| 2†   | Bacteria; Firmicutes; Clostridia; Clostridiales; Christensenellaceae; <i>R-7 group</i>                    | 2.90%                  | 3.97%          | 4          | 2         |
| 1†   | Bacteria; Chloroflexi; Anaerolineae; Anaerolineales; Anaerolineaceae; <i>Flexilinea</i>                   | 2.72%                  | 4.27%          | 6          | 4         |
| 22   | Bacteria; Bacteroidetes; Bacteroidia; Bacteroidales; Prevotellaceae; <i>Prevotella 7</i>                  | 1.09%                  | 0.18%          | 10         | 85        |
| 21   | Bacteria; Firmicutes; Clostridia; Clostridiales; Ruminococcaceae; <i>UCG-005</i>                          | 0.84%                  | 0.99%          | 13         | 18        |
| 31   | Bacteria; Firmicutes; Clostridia; Clostridiales; Lachnospiraceae; <i>Oribacterium</i>                     | 0.96%                  | 0.27%          | 19         | 61        |
| 30   | Bacteria; Proteobacteria; Gammaproteobacteria; Betaproteobacteriales; Burkholderiaceae; <i>Sutterella</i> | 0.95%                  | 0.14%          | 16         | 86        |
| 33   | Bacteria; Firmicutes; Clostridia; Clostridiales; Ruminococcaceae; <i>Ruminiclostridium 9</i>              | 0.73%                  | 0.76%          | 17         | 35        |
| 59   | Bacteria; Firmicutes; Clostridia; Clostridiales; Ruminococcaceae; <i>UCG-002</i>                          | 0.39%                  | 0.51%          | 43         | 31        |
| 70   | Bacteria; Actinobacteria; Coriobacteriia; Coriobacteriales; Eggerthellaceae; <i>Senegalimassilia</i>      | 0.32%                  | 0.48%          | 67         | 40        |
| 152  | Bacteria; Bacteroidetes; Bacteroidia; Bacteroidales; Prevotellaceae                                       | 0.15%                  | 0.11%          | 100        | 123       |
| 128† | Bacteria; Firmicutes; Clostridia; Clostridiales; Ruminococcaceae; <i>Flavonifractor</i>                   | 0.18%                  | 0.22%          | 82         | 67        |
| 51†  | Bacteria; Firmicutes; Erysipelotrichia; Erysipelotrichales; Erysipelotrichaceae; <i>Solobacterium</i>     | 0.46%                  | 0.16%          | 48         | 98        |
| 8†   | Bacteria; Firmicutes; Clostridia; Clostridiales; Lachnospiraceae; <i>Oribacterium</i>                     | 2.11%                  | 0.49%          | 14         | 37        |

473 † Taxon greater than 1% relative abundance in both populations (identifiable also by similar, high rank).

474 Shaded rows highlight taxa present in every sample collected during the dry season. With the exceptions of *Flavonifractor*  
 475 sp. (ASV128†), *Solobacterium sp.*, (ASV51†), and *Oribacterium sp.* (ASV8†), these taxa were also present in each rainy  
 476 season sample and hence the abundances are shown including samples collected during the rainy season. *Flavonifractor* sp.  
 477 (ASV128†), *Solobacterium sp.*, (ASV51†), and *Oribacterium sp.* (ASV8†) were missing from one, one, and two individual(s),  
 478 respectively, in the Chimanuka group (KBNP) collected during the rainy season.

479 § Rank is calculated by ranking each taxon by its relative abundance in a sample and calculating its mean rank across all  
 480 samples in a population. It thus reflects the average abundance rank of a given taxon across all samples in a population.

481

482 In accordance with previous studies on great apes (Campbell et al., 2020; Gomez et al., 2016b;  
 483 Hicks et al., 2018; Nishida & Ochman, 2019), Grauer's gorilla gut microbiome in both populations  
 484 was dominated by the phyla Firmicutes (65.6% in KBNP, 60.0% in NCA%), Bacteroidetes (20.7% in  
 485 KBNP, 23.1% in NCA.0%), Spirochaetes (3.5% in KBNP, 5.4% in NCA), Chloroflexi (2.7% in  
 486 KBNP, 4.3% in NCA), Proteobacteria (2.8% in KBNP, 3.4% in NCA), and Actinobacteria (2.0% in  
 487 KBNP, 1.8% in NCA) (**Figure S10**), representing a diversity of microbial families (**Figure 4A**).  
 488

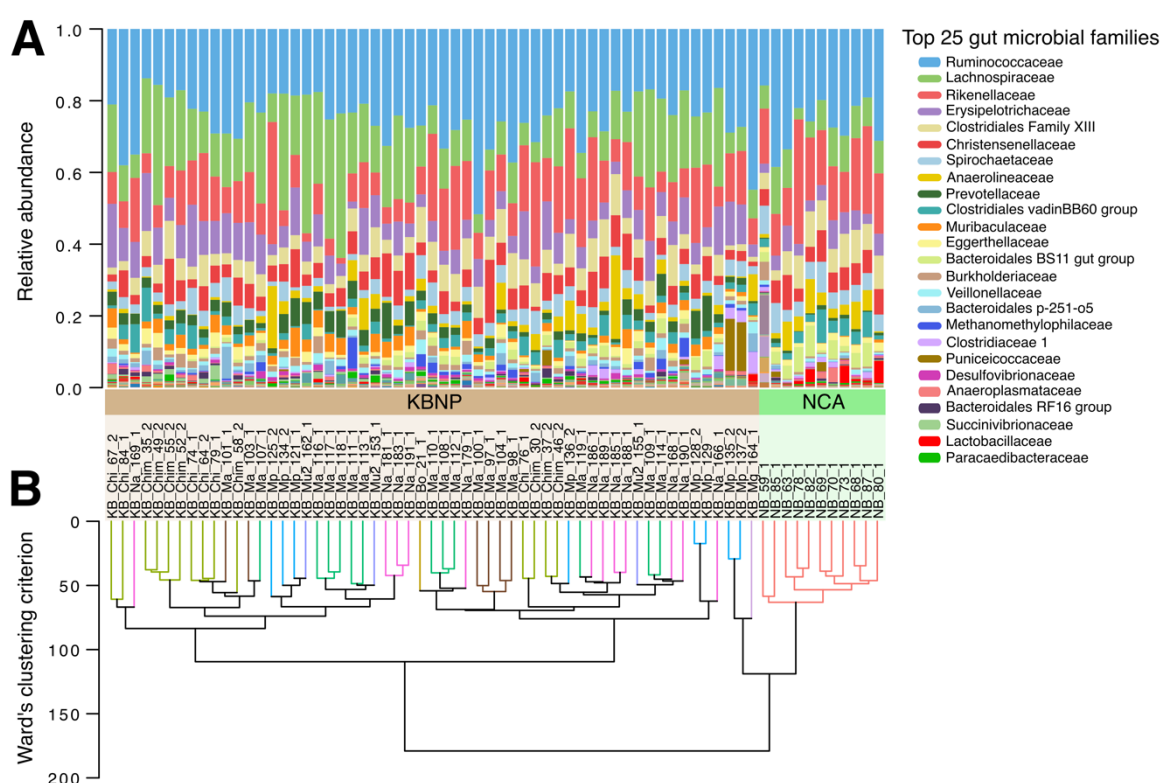

489 **Figure 4.** Gut microbiome composition (**A**) at the family level and (**B**) showing population clustering in composition, using  
 490 CLR Aitchison distances dendrogram based on Ward's clustering criterion (Murtagh and Legendre 2014).  
 491  
 492

493  
 494 ***Diversity and composition of the gut microbiome in Grauer's gorillas correlates with population***  
 495 ***and social group identity***

496 Gut microbiome richness and evenness were significantly higher in the high-altitude  
 497 population (richness: mean KBNP = 202.2±20.0 taxa vs. NCA = 190.2±14.0;  $p = 0.02$ ; evenness:

498 83.7±17.8 vs. 74.2±12.8,  $p = 0.01$ ), the opposite trend to diet, although neither microbiome richness  
499 nor evenness were related to altitude within KBNP ( $p = 0.07, 0.9$ ; **Table S13**; **Figure S11**). While  
500 richness of the microbiome did not differ by sex ( $p = 0.2$ ), females had more even microbiomes than  
501 males (85.7 vs. 78.5,  $p = 0.002$ ). There were no differences by age (richness  $p = 0.3$ ; evenness  $p =$   
502 0.1). The gut microbiome alpha diversity differed significantly by population even after removing  
503 rainy season samples (excluding Chimanuka group; richness  $p = 0.001$ , evenness  $p = 0.008$ ; **Table**  
504 **S13**).

505 Gut microbiome composition differed between the two populations (KBNP and NCA)  
506 (**Figure 2C**) and among social groups (**Figure 4A-B**), with population explaining 10.5% of the total  
507 variance, and social group in KBNP explaining an additional 17.8% ( $p < 0.001$ ; **Table 4**). Intergroup  
508 differences were significant, including among groups collected during the dry season (**Table 4**).  
509 Overall, gut microbiome dissimilarity was largest between individuals of different populations,  
510 followed by individuals from different social groups, and smallest between individuals from the same  
511 social group (**Figure 5C**). While altitude explained 12.7% of the variance across populations ( $N=56, p$   
512  $< 0.001$ ) it only accounted for 3.8% in KBNP ( $N=45, p = 0.01$ ). Genetic distance among gorillas was  
513 not a significant predictor of gut microbiome composition in NCA ( $N=11, \rho = -0.080, p = 0.7$ ) or  
514 KBNP when social group was also considered ( $\rho = 0.015, p = 0.3$ ). Microbiome composition did not  
515 differ by sex or age ( $p > 0.05$ , **Table 4**). Results using only dry season samples (**Table S14A**) and  
516 phylogeny-informed (phILR) distances were qualitatively similar (**Table S15**).

517 We identified 42 taxa that significantly differed in abundance between NCA and KBNP ( $p <$   
518  $0.05$ , effect size  $> 1$ ) (**Table S16**). At the family-level, gorilla gut microbiomes in KBNP had a higher  
519 abundance of Muribaculaceae and Erysipelotrichaceae, whereas the gut microbiomes in NCA had  
520 more Spirochaetaceae and Christensenellaceae. At a finer phylogenetic level, populations differed in  
521 abundance of specific ASVs belonging to common, shared families like Rikenellaceae,  
522 Lachnospiraceae, and Ruminococcaceae.

523



524 **Table 4.** PERMANOVA model of factors influencing microbiome composition

| Variable     | Df | R <sup>2</sup> | F    | p      | Post-hoc tests                                                                                                                                                                                                       |                                                                   |
|--------------|----|----------------|------|--------|----------------------------------------------------------------------------------------------------------------------------------------------------------------------------------------------------------------------|-------------------------------------------------------------------|
|              |    |                |      |        | Significant pairwise comparisons                                                                                                                                                                                     | p <sub>Bonferroni</sub>                                           |
| Read Count   | 1  | 0.019          | 1.68 | 0.05   | –                                                                                                                                                                                                                    |                                                                   |
| Population   | 1  | 0.105          | 7.97 | <0.001 | KBNP – NCA                                                                                                                                                                                                           | < 0.001                                                           |
| Social Group | 5  | 0.178          | 2.18 | <0.001 | Chimanuka‡ – Nouvelle Famille<br>Chimanuka‡ – Mankoto<br>Chimanuka‡ – Mpungwe<br>Chimanuka‡ – Namadiriri<br>Nouvelle Famille – Mankoto<br>Nouvelle Famille – Namadiriri<br>Mankoto – Mpungwe<br>Mankoto – Namadiriri | 0.004<br>0.01<br>0.007<br>0.004<br>0.02<br>0.01<br>0.007<br>0.004 |
| Sex          | 1  | 0.014          | 1.18 | 0.2    | –                                                                                                                                                                                                                    |                                                                   |
| Age class†   | 2  | 0.031          | 1.22 | 0.2    | –                                                                                                                                                                                                                    |                                                                   |

525 †Age class (Infants (N=3), Juveniles/subadults (N=21), Adults (N=38)) was modeled separately using a reduced dataset, since only 62 of the  
526 68 samples had age estimates. In this model the other predictor variables had similar estimates as in the complete dataset.

527 ‡Samples from Chimanuka group in KBNP were collected during the rainy season, whereas all other samples were collected during the dry  
528 season. Results were similar when removing Chimanuka (Table S14A).

529  
530

### 531 *Diet and gut microbiome co-vary across studied populations*

532 Compositional differences in dietary and gut microbial profiles showed significant co-inertia  
533 (RV = 0.557,  $p < 0.001$ ; **Figure 5B**) and were correlated ( $\rho = 0.32$ ,  $p < 0.001$ ; **Figure 5C**), even after  
534 removing the rainy season samples from Chimanuka (RV = 0.599,  $p < 0.001$ ;  $\rho = 0.35$ ,  $p < 0.001$ ). We  
535 detected no correspondence between dietary and gut microbial richness ( $p = 0.2$ ; **Figure 5A**) or  
536 evenness ( $p = 0.1$ ). Microbiome composition is known to change with diet in individuals and also  
537 differs between populations with different dietary preferences (*e.g.*, Reese et al., 2021; Youngblut et  
538 al., 2019). However, in our dataset, only population and social group were significantly correlated  
539 with gut microbiome composition, whereas dietary composition, geography, and genetic relatedness  
540 had no effect after accounting for social group and population of origin (**Table 5**; **Table S14B**). As  
541 with other analyses, dataset subsampling indicated that results were robust to sample size differences  
542 between populations (**Table S17**).

543

544 **Table 5.** MRM model comparing the effects of geography, diet, and sociodemographic factors on Grauer's  
 545 gorilla gut microbiome composition‡

| MRM Model of Gut Microbiome Composition |                   |                   | MRM Model Statistics |                |             |
|-----------------------------------------|-------------------|-------------------|----------------------|----------------|-------------|
| Explanatory Variable                    | Spearman's $\rho$ | $p$               | N                    | R <sup>2</sup> | F-statistic |
| Geographic distance                     | 0.07              | 0.4               | 56                   | 0.278          | 98.35       |
| Altitudinal difference                  | -0.08             | 0.6               |                      |                |             |
| Diet composition†                       | -0.19             | 0.07              |                      |                |             |
| <b>Population</b>                       | <b>0.64</b>       | <b>&lt; 0.001</b> |                      |                |             |
| <b>Social group</b>                     | <b>0.45</b>       | <b>&lt; 0.001</b> |                      |                |             |

546 † Microbiome and diet composition in Aitchison distances.

547 ‡ Model results without Chimánuka are shown in Table S14B.

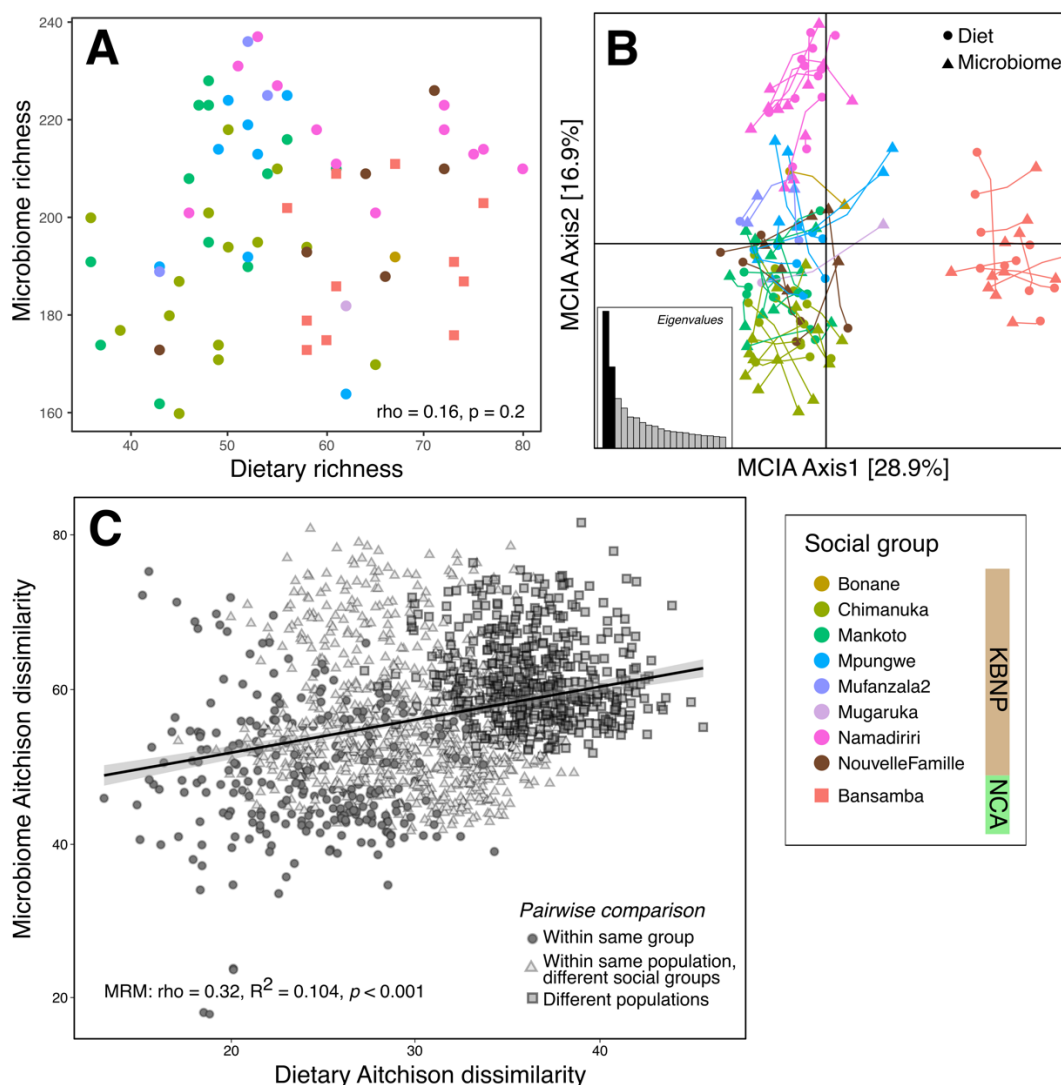

548 **Figure 5.** Relationship between diet and gut microbiome. **(A)** Microbiome and dietary richness, assessed as per-sample total  
 549 sequence count, are not correlated ( $p = 0.2$ ). **(B)** High multiple co-inertia (MCI) between microbiome and diet composition  
 550 in CLR-transformed space with Aitchison distance ( $RV = 55.7\%$ ,  $MC p < 0.001$  based on 999 permutations). **(C)**  
 551 Compositional differences (Aitchison distances) in diet and microbiome between samples (i.e., individual gorillas) are  
 552 correlated in matrix regression.  
 553  
 554

## 555 **Discussion**

556           In this study, we applied fecal genotyping and DNA metabarcoding to identify Grauer's  
557 gorilla individuals and characterize their diet and gut microbiome in three populations from across the  
558 species' range. We were able to include a so far unstudied population from MNP and show that it is  
559 genetically distinct from two previously assessed populations KBNP and NCA (Baas et al., 2018).  
560 Grauer's gorillas occur across the greatest altitudinal range of all gorilla taxa (Plumptre et al., 2016)  
561 and our study sites include the low and high altitude extremes. This provided us with the opportunity  
562 to test for dietary and gut microbial co-differentiation among the isolated populations of this critically  
563 endangered great ape. In particular, we set out to investigate if the gut microbiome may facilitate local  
564 adaptation by supporting digestion of diverse foods. Alternatively, the presence of conserved dietary  
565 patterns across populations along with a core gut microbiome would be indicative of a stabilizing role  
566 of gut microorganisms, which may limit ecological adaptation. Gorillas consume a wide variety of  
567 herbaceous vegetation, and fruits, when available, and their diet shows seasonal variation (Harcourt &  
568 Stewart, 2013; Rogers et al., 2004; Rothman et al., 2008; Yamagiwa et al., 1994). In Grauer's gorillas,  
569 studies that rely on different methodologies suggested some differences in diet between populations  
570 (van der Hoek, Pazo, et al., 2021; Yamagiwa et al., 2005). However, previous studies did not assess  
571 the gut microbiome, and hence could not characterize its contribution to these differences.

572           Our joint diet and gut microbiome analyses provide little evidence for dietary conservation  
573 across populations but uncover a stable set of gut microorganisms that are shared among  
574 geographically, genetically, and ecologically distinct populations of Grauer's gorillas. We detect co-  
575 variation in diet and microbiome, likely as a result of habitat differences and social factors among  
576 populations and social groups. Our results are thus consistent with the notion that the gut microbiome,  
577 although being conserved to some degree, provides sufficient flexibility to allow exploitation of  
578 diverse dietary resources and hence could contribute to local adaptation. In addition, we obtain  
579 evidence that dietary choice in Grauer's gorillas is at least partially determined by plant availability,  
580 with a larger dietary repertoire at lower elevations.

581

582 *New insights into Grauer's gorilla diet and feeding behavior*

583 Grauer's gorillas in the three study populations consumed 120 different plant taxa (**Table S8**),  
584 which is similar to the dietary composition and diversity reported in observational studies (116 and  
585 100 different plants; van der Hoek, Pazo, et al., 2021; Yamagiwa et al., 2005; respectively). Low  
586 altitude populations consumed a greater diversity of plants than high altitude populations (**Figure 3**;  
587 **Figure S7**; **Table S9**), consistent with higher biodiversity (including plant diversity) at lower altitudes  
588 (Imani et al., 2016; Rahbek, 1995). We documented an average of 54-66 different plant taxa in each  
589 fecal sample, which is considerably more than reported daily diversity of consumed plants per  
590 individual based on behavioral observations (17 plant taxa per day on average in KBNP; Yamagiwa et  
591 al., 2005). In captivity, gorilla gut retention time was estimated to be 24 to 60 hours (Remis, 2000).  
592 Therefore, each fecal sample could represent plants consumed over the period of up to three days, with  
593 some items digested faster than others. Alternatively, our method could capture taxa that are missed in  
594 observational studies because they are consumed infrequently or in small quantities, at times of the  
595 day that are rarely observed (early in the morning or late in the evening), or which may be  
596 contaminants, parts of nest building material or involved in play or display and unrelated to diet. We  
597 discuss other potential limitations of molecular dietary analyses in detail below.

598 We detected 21 plant taxa that have, to our knowledge, not been reported as Grauer's gorilla  
599 foods (**Table S8**; **Figure S6**). Some of these plants grow in KBNP (Spira et al., 2018) and are  
600 consumed by mountain gorillas (*e.g.*, Solanoideae; Rothman et al., 2014; Watts, 1984) or western  
601 lowland gorillas (*e.g.*, Laruales; Remis et al., 2001). Other plants, such as *Gnetum* and Humiriaceae,  
602 have not been documented in KBNP but are western lowland gorilla foods (Rogers et al., 2004;  
603 Takenoshita & Yamagiwa, 2008), which is consistent with their significantly higher abundance in the  
604 low-altitude sites of MNP and NCA.

605 Grauer's gorillas in different populations consumed distinct diets (**Figure 2, 3**; **Table 1, 2**),  
606 with only two taxa shared across all three populations at an average abundance >1% per sample: *Ficus*  
607 *sp.* and Apocynoideae *sp.* (likely *Baissea sp.*, *Funtumia sp.*, or *Motandra sp.* based on plant  
608 distribution; Spira et al., 2018). At broader taxonomic scales, all individuals consumed four plant

609 families (Urticaceae, Apocynaceae, Moraceae, and Vitaceae), but the relative abundances varied  
610 considerably across populations, from less than 1% to up to 42%. The detection of shared taxa  
611 suggests that the same plants or their close relatives are present in the habitat of all three populations.  
612 However, the pronounced differences in their relative abundance suggest either that (1) their  
613 availability differs across study sites, and gorilla dietary choice is essentially passive and primarily  
614 based on food availability, or (2) that gorilla dietary choice is strongly determined by social factors,  
615 and food selection is a result of variation in culturally-transmitted feeding preference that differ across  
616 populations and social groups. Higher dietary diversity of low-altitude populations supports the first  
617 notion of rather opportunistic consumption of available plants. However, we also uncover distinct  
618 dietary signatures of social groups from the same population, which is consistent with social factors  
619 playing a role. Since gorilla groups show extensive range overlap, they would be well-suited for future  
620 investigations into the role of cultural versus ecological factors affecting dietary choices by evaluating  
621 if group-specific dietary patterns persist even when different social groups use the same habitat.

622

### 623 *The role of Grauer's gorilla gut microbiome in ecological adaptation*

624 In accordance with previous studies (Amato et al., 2019; Campbell et al., 2020; Gomez et al.,  
625 2016b; Moeller et al., 2014), we detect evidence for the presence of a Grauer's gorilla core gut  
626 microbiome (**Table 3, Figure 4**). We identified eleven taxa belonging to cellulose- and other  
627 carbohydrate-degrading clades that were present in all study samples. Many of the microbial phyla,  
628 families, genera that are conserved across Grauer's gorilla samples are also common in other great ape  
629 gut microbiomes, including western lowland gorillas, chimpanzees, and humans (Campbell et al.,  
630 2020; Fonsere et al., 2021; Gomez et al., 2015, 2016b; Hicks et al., 2018; Nishida & Ochman, 2019).  
631 Despite shared taxa, the gut microbiome composition in Grauer's gorillas differed by population and  
632 to a lesser extent by social group, but considerably less so than dietary composition. This could be  
633 explained by the functional constraints placed on the gut microbiome, with key taxa required to  
634 perform essential functions in digestion. Other taxa may be allowed to vary and co-diversify with the  
635 host. Indeed, inter-species studies in primates find a strong effect of host evolutionary relationships on

636 gut microbiome structure and composition (Amato et al., 2019) and we expect to detect similar, albeit  
637 less pronounced differences across isolated populations.

638 Our results indicate that dietary choice is not constrained by the gut microbiome. This is in  
639 line with many studies showing that animals, including all subspecies of gorillas (Harcourt & Stewart,  
640 2013), experience seasonal dietary changes, which are also accompanied by gut microbiome changes  
641 (Baniel et al., 2021; Gomez et al., 2016a; Hicks et al., 2018; Orkin et al., 2019; Sharma et al., 2020).  
642 Here we detect differences between isolated populations, sampled during the same season, which are  
643 likely the joint result of gut microbiome-host co-diversification and plasticity of the gut microbial  
644 community that may facilitate local adaptation to different environmental conditions. Inter-population  
645 differences tended to derive from differential abundance of specific taxa within common bacterial  
646 families, like Lachnospiraceae and Rikellenaceae, which is consistent with the presence of the core  
647 microbiome in our study populations. There were, however, several differences at the family level that  
648 exemplify microbiome plasticity. For example, compared to KBNP, *Treponema* (ASV322,  
649 Spirochaetaceae) was significantly more abundant in NCA, where the plant taxa Marantaceae and  
650 Zingiberaceae were more abundant. Hicks et al. (2018) found the same correspondence between these  
651 gut microbial and dietary taxa in western lowland gorillas and suggested that it was due to the high  
652 fiber content of these fallback foods, which are also important for Grauer's gorillas at low-elevation  
653 (van der Hoek, Pazo, et al., 2021).

654 We detect no effects of genetic relatedness or geographic distance on gut microbiome  
655 composition, despite clear group-specific microbiome patterns. Our findings thus support previous  
656 studies that show the influence of sociality on gut microbiome composition in primates (chimpanzees,  
657 Degnan et al., 2012; Moeller et al., 2016; baboons, Tung et al., 2015; colobus monkeys, Wikberg et  
658 al., 2020; black howler monkeys, Amato et al., 2017; sifakas, Perofsky et al., 2017, 2021; Rudolph et  
659 al., 2022; humans, Dill-McFarland et al., 2019) and other group-living animals (e.g. bighorn sheep,  
660 Couch et al., 2020). Members of the same social group travel together and experience the same  
661 environments over extended periods of time, which could synchronize their diet and also their  
662 microbiome. The gut microbiome may in addition be directly influenced by social interactions, such as

663 grooming and coprophagy (Amato et al., 2016; Archie & Tung, 2015; Graczyk & Cranfield, 2003).  
664 However, this does not mean that host genetics are unimportant, as longitudinal studies in Amboseli  
665 baboons have shown that the primate gut microbiome is highly heritable, which cannot easily be  
666 detected in shorter-term studies (Grieneisen et al., 2021).

667         The plasticity of the gut microbiome supports its potential role in facilitating adaptation to  
668 different ecological conditions, which has important consequences for species evolution, dispersal and  
669 conservation. Adaptation to changes in ecological conditions as a result of climate change, range  
670 expansion, or population dispersal into novel habitats may be supported by the ability to digest diverse  
671 foods. Several studies have reported habitat-biased dispersal in mammals, including in mountain  
672 gorillas (Guschanski et al., 2008), where individual dispersal decisions appear to be driven by the  
673 availability of familiar foods. If the microbiome was implicated in restricting dietary choice, we would  
674 expect much greater conservation of dietary items across populations than what we observe here,  
675 particularly as similar food plants appear to be available in different regions. This means that gut  
676 microbiome flexibility may provide the necessary support for translocations of individuals or  
677 populations into different habitats, which is an open question in conservation management (West et  
678 al., 2019). Nevertheless, the gut microbiome may impose constraints on the diet by driving selection  
679 of foods of similar nutrient content, even if they differ taxonomically. For example, giant pandas have  
680 typical carnivore gut microbiomes despite being bamboo specialists because the nutritional value of  
681 consumed bamboo is similar to that of meat (Nie et al., 2019). Similarly, the gut microbiome of wild  
682 rhesus macaques is strongly correlated to seasonal patterns of macronutrient intake, but not food type  
683 (*e.g.*, fruit, leaves, etc.) (Cui et al., 2021). Metabolic analyses of gorilla diet, as performed for different  
684 social groups and seasons in other gorilla species (*e.g.*, Gomez et al., 2015; Rothman et al., 2008), will  
685 enable investigating whether nutritional values are conserved in different populations.

686

687 *Understanding diet and ecology of wild animals requires a combination of approaches*

688         As every method, the metabarcoding approach to diet and microbiome faces limitations,  
689 specifically in the form of marker gene selection, reference database bias, threshold decisions, and

690 interpretation of abundance. While Grauer's gorillas predominantly feed on vegetative plants, they  
691 occasionally consume insects and fungi (van der Hoek, Pazo, et al., 2021; Yamagiwa et al., 1991). By  
692 choosing a chloroplast gene, *trnL*, we restricted dietary characterization in this study to plants only.  
693 For dietary analysis of species with omnivorous diets, expanding to multiple loci that are able to  
694 characterize the diversity of consumed foods would be necessary (Taberlet et al., 2018). Further,  
695 metabarcoding relies on a reference database for taxonomic identification, making it limited by the  
696 content of these databases, which may be incomplete for biodiversity-rich or extreme habitats and  
697 unstudied microbiomes (Hird, 2017; Taberlet et al., 2018). Similarly, chosen thresholds for sequence  
698 identity and relative abundance could remove genuine dietary or microbial constituents. We used  
699 conservative sequence identity and relative abundance thresholds similar to those employed in other  
700 studies of diet and gut microbiome (Deagle et al., 2019; Hibert et al., 2013; Quéméré et al., 2013;  
701 Srivathsan et al., 2016). However, this does not completely guard against removal of genuine taxa,  
702 particularly for dietary characterization, due to the small size and high variability of the *trnL* locus.  
703 Additionally, estimated abundances of the different plant and microbial taxa may not accurately reflect  
704 their abundances (Deagle et al., 2019; Gloor et al., 2017). DNA copy number can be biased by plant  
705 tissue type (*i.e.*, fruit, pith, leaves, the latter of which contain more chloroplasts; Egea et al., 2010), the  
706 copy number of the rRNA locus, relative digestibility (*i.e.*, amount of fiber), and PCR amplification  
707 success (reviewed by Deagle et al., 2019). However, other methods for dietary characterization also  
708 face biases. For example, accuracy of macroscopic fecal analysis depends on the types of tissues  
709 consumed and the extent of digestion (King & Schoenecker, 2019). Observational studies can  
710 overestimate the dietary importance of foods with longer handling times (Matthews et al., 2020) and  
711 require habituating study animals, which may make them more vulnerable to poaching and increase  
712 exposure to human-transmitted diseases (Green & Gabriel, 2020). Hence, understanding ecological  
713 and particularly dietary diversity of different animal species would benefit from a combination of  
714 approaches. Molecular methods are particularly suited for the study of unhabituated animals, in  
715 regions where tracking over a long time period is not feasible or desirable.



716           The use of shotgun metagenomics will ameliorate many of the limitations described above and  
717 allow for more complete interpretation by also enabling functional characterization of gut microbial  
718 communities. It would thus be feasible to test if the gut microbiome differs in functional profiles as a  
719 result of dietary differences across populations, or if functions remain conserved, suggesting that  
720 nutritional values of different diets are indeed similar. With the decrease in sequencing costs and  
721 massive growth of whole genome reference databases that become available as a result of genome  
722 sequencing initiatives (Formenti et al., 2022; Lewin et al., 2018), the use of shotgun metagenomics  
723 will increase in the coming years, fueling the application of the hologenomic framework to wild  
724 animal populations.

725

## 726 *Conclusions*

727           Our results suggest that the animal gut microbiome may contribute to adaptation to new  
728 environments, while retaining a core set of potentially essential constituents. We provide evidence that  
729 this microbial plasticity is associated with dietary flexibility, and as such the gut microbiome may  
730 enable the host to exploit new resources, a precursor to local adaptation. If so, the microbiome may  
731 indirectly encourage subsequent cultural adaptation to feeding on new dietary items. We emphasize  
732 the utility of fecal sampling for minimally-invasive population monitoring of different aspects of  
733 endangered species biology, from genetics to ecology and foraging behavior. Despite its limitations, a  
734 molecular approach can reveal otherwise clandestine insights into the biology of elusive animals and  
735 is particularly powerful when combined with traditional observational methods. Our results highlight  
736 the importance of incorporating multiple axes of population differentiation into studies of endangered  
737 animals, since safeguarding ecological and genetic biodiversity is the primary objective of species  
738 conservation.

739

740 **Acknowledgements**

741 We thank L’Institut Congolais pour la Conservation de la Nature (ICCN) and local landowners and  
742 community members for permitting us to work in the Kahuzi-Biega National Park and the Nkuba  
743 Conservation Area. We are indebted to numerous rangers and field assistants in Kahuzi-Biega  
744 National Park as well as field assistants, gorilla trackers, and local community members in Nkuba  
745 Conservation Area who, through their effort and commitment, support this project and ensure the  
746 survival of the Grauer’s gorillas. This research was supported by the Royal Physiographic Society of  
747 Lund Jan Löfqvist and Nilsson-Ehle Endowments to KG, the Erasmus Mundus Master Programme in  
748 Evolutionary Biology Consortium Scholarship to AM, and the Swedish Phytogeographical Society  
749 and the Extensus Foundation Grants to LP. The Dian Fossey Gorilla Fund’s work in DRC was  
750 supported by individual donations and grants from the Great Ape Conservation Fund of the US Fish  
751 and Wildlife Service, the Arcus Foundation, the Daniel L. Thorne Foundation, and the Turner  
752 Foundation. Sequencing was performed by the SNP&SEQ Technology Platform in Uppsala. The  
753 SNP&SEQ Technology Platform is part of the National Genomics Infrastructure Sweden and Science  
754 of Life Laboratory. The SNP&SEQ Platform is also supported by the Swedish Research Council and  
755 the Knut and Alice Wallenberg Foundation. We also acknowledge the National Bioinformatics  
756 Infrastructure for providing computational resources to this project.

757

758 **References**

- 759
- 760 Agranyoni, O., Menger-Mordechay, S., Uzan, A., Ziv, O., Salmon-Divon, M., Rodin, D., Raz, O., Koman, I.,  
761 Koren, O., Pinhasov, A., & Navon-Venezia, S. (2021). Gut microbiota determines the social behavior of  
762 mice and induces metabolic and inflammatory changes in their adipose tissue. *Npj Biofilms and*  
763 *Microbiomes*, 7(1), 1–14. <https://doi.org/10.1038/s41522-021-00193-9>
- 764 Aitchison, J., Barceló-Vidal, C., Martín-Fernández, J. A., & Pawlowsky-Glahn, V. (2000). Logratio analysis and  
765 compositional distance. *Mathematical Geology*, 32(3), 271–275.
- 766 Alberdi, A., Aizpurua, O., Bohmann, K., Zepeda-Mendoza, M. L., & Gilbert, M. T. P. (2016). Do vertebrate gut  
767 metagenomes confer rapid ecological adaptation? *Trends in Ecology and Evolution*, 31(9), 689–699.  
768 <https://doi.org/10.1016/j.tree.2016.06.008>
- 769 Amato, K. R., G. Sanders, J., Song, S. J., Nute, M., Metcalf, J. L., Thompson, L. R., Morton, J. T., Amir, A., J.  
770 McKenzie, V., Humphrey, G., Gogul, G., Gaffney, J., L. Baden, A., A.O. Britton, G., P. Cuzzo, F., Di  
771 Fiore, A., J. Dominy, N., L. Goldberg, T., Gomez, A., ... R. Leigh, S. (2019). Evolutionary trends in host  
772 physiology outweigh dietary niche in structuring primate gut microbiomes. *ISME Journal*, 13(3), 576–587.  
773 <https://doi.org/10.1038/s41396-018-0175-0>
- 774 Amato, K. R., Martinez-Mota, R., Righini, N., Raguet-Schofield, M., Corcione, F. P., Marini, E., Humphrey, G.,  
775 Gogul, G., Gaffney, J., Lovelace, E., Williams, L. S., Luong, A., Dominguez-Bello, M. G., Stumpf, R. M.,  
776 White, B., Nelson, K. E., Knight, R., & Leigh, S. R. (2016). Phylogenetic and ecological factors impact the  
777 gut microbiota of two Neotropical primate species. *Oecologia*, 180(3), 717–733.  
778 <https://doi.org/10.1007/s00442-015-3507-z>
- 779 Amato, K. R., Van Belle, S., Di Fiore, A., Estrada, A., Stumpf, R., White, B., Nelson, K. E., Knight, R., &  
780 Leigh, S. R. (2017). Patterns in gut microbiota similarity associated with degree of sociality among sex  
781 classes of a neotropical primate. *Microbial Ecology*, 74(1), 250–258. [https://doi.org/10.1007/s00248-017-](https://doi.org/10.1007/s00248-017-0938-6)  
782 [0938-6](https://doi.org/10.1007/s00248-017-0938-6)
- 783 Anderson, M. J., & Walsh, D. C. I. (2013). PERMANOVA, ANOSIM, and the Mantel test in the face of  
784 heterogeneous dispersions: what null hypothesis are you testing? *Ecological Monographs*, 83(4), 557–574.
- 785 Arandjelovic, M., Guschanski, K., Schubert, G., Harris, T. R., Thalmann, O., Siedel, H., & Vigilant, L. (2009).  
786 Two-step multiplex polymerase chain reaction improves the speed and accuracy of genotyping using DNA  
787 from noninvasive and museum samples. *Molecular Ecology Resources*, 9(1), 28–36.  
788 <https://doi.org/10.1111/j.1755-0998.2008.02387.x>
- 789 Arbizu, P. M. (2020). *pairwiseAdonis: pairwise multilevel comparison using adonis*. [https://github.](https://github.com/pmartinezarbizu/pairwiseAdonis)  
790 [com/pmartinezarbizu/pairwiseAdonis](https://github.com/pmartinezarbizu/pairwiseAdonis).
- 791 Archie, E. A., & Tung, J. (2015). Social behavior and the microbiome. *Current Opinion in Behavioral Sciences*,  
792 6, 28–34. <https://doi.org/10.1016/j.cobeha.2015.07.008>
- 793 Baas, P., van der Valk, T., Vigilant, L., Ngobobo, U., Binyinyi, E., Nishuli, R., Caillaud, D., & Guschanski, K.  
794 (2018). Population-level assessment of genetic diversity and habitat fragmentation in critically endangered  
795 Grauer's gorillas. *American Journal of Physical Anthropology*, 165(3), 565–575.  
796 <https://doi.org/10.1002/ajpa.23393>
- 797 Baniel, A., Amato, K. R., Beehner, J. C., Bergman, T. J., Mercer, A., Perlman, R. F., Petruccio, L., Reitsema, L.,  
798 Sams, S., Lu, A., & Snyder-Mackler, N. (2021). Seasonal shifts in the gut microbiome indicate plastic  
799 responses to diet in wild geladas. *Microbiome*, 9(1), 1–20. <https://doi.org/10.1186/s40168-020-00977-9>
- 800 Bates, D., Maechler, M., Bolker, B. M., & Walker, S. (2015). Fitting linear mixed-effects models using lme4.  
801 *Journal of Statistical Software*, 67(1), 1–48.
- 802 Bergmann, G. T., Craine, J. M., Robeson, M. S., & Fierer, N. (2015). Seasonal shifts in diet and gut microbiota  
803 of the American bison (*Bison bison*). *PLoS ONE*, 10(11), 1–14.  
804 <https://doi.org/10.1371/journal.pone.0142409>
- 805 Boyer, F., Mercier, C., Bonin, A., Le Bras, Y., Taberlet, P., & Coissac, E. (2016). obitools: A unix-inspired  
806 software package for DNA metabarcoding. *Molecular Ecology Resources*, 16(1), 176–182.
- 807 Bradley, B. J., Chambers, K. E., & Vigilant, L. (2001). Accurate DNA-based sex identification of apes using  
808 non-invasive samples. *Conservation Genetics*, 2(2), 179–181. <https://doi.org/10.1023/A:1011847528045>
- 809 Brealey, J. C., Leitão, H. G., Hofstede, T., Kalthoff, D. C., & Guschanski, K. (2021). The oral microbiota of wild  
810 bears in Sweden reflects the history of antibiotic use by humans. *Current Biology*, 31(20), 4650–4658.e6.  
811 <https://doi.org/10.1016/j.cub.2021.08.010>
- 812 Brealey, J. C., Leitão, H. G., Van-Der-Valk, T., Xu, W., Bougiouri, K., Dalén, L., & Guschanski, K. (2020).  
813 Dental calculus as a tool to study the evolution of the mammalian oral microbiome. *Molecular Biology and*  
814 *Evolution*, 37(10), 3003–3022. <https://doi.org/10.1093/molbev/msaa135>
- 815 Bueno de Mesquita, C. P., Nichols, L. M., Gebert, M. J., Vanderburgh, C., Bocksberger, G., Lester, J. D., Kalan,

- 816 A. K., Dieguez, P., McCarthy, M. S., Agbor, A., Álvarez Varona, P., Ayimisin, A. E., Bessone, M.,  
817 Chancellor, R., Cohen, H., Coupland, C., Deschner, T., Egbe, V. E., Goedmakers, A., ... Dunn, R. R.  
818 (2021). Structure of chimpanzee gut microbiomes across tropical Africa. *MSystems*, 6(3).  
819 <https://doi.org/10.1128/msystems.01269-20>
- 820 Callahan, B. J., McMurdie, P. J., Rosen, M. J., Han, A. W., Johnson, A. J. A., & Holmes, S. P. (2016). DADA2:  
821 High-resolution sample inference from Illumina amplicon data. *Nature Methods*, 13(7), 581–583.  
822 <https://doi.org/10.1038/nmeth.3869>
- 823 Campbell, T. P., Sun, X., Patel, V. H., Sanz, C., Morgan, D., & Dantas, G. (2020). The microbiome and  
824 resistome of chimpanzees, gorillas, and humans across host lifestyle and geography. *ISME Journal*, 14(6),  
825 1584–1599. <https://doi.org/10.1038/s41396-020-0634-2>
- 826 Chao, A., Gotelli, N. J., Hsieh, T. C., Sander, E. L., Ma, K. H., Colwell, R. K., & Ellison, A. M. (2014).  
827 Rarefaction and extrapolation with Hill numbers: a framework for sampling and estimation in species  
828 diversity studies. *Ecological Monographs*, 84(1), 45–67.
- 829 Chatterji, S., & Pachter, L. (2006). Reference based annotation with GeneMapper. *Genome Biology*, 7(4), 1–10.
- 830 Colston, T. J., & Jackson, C. R. (2016). Microbiome evolution along divergent branches of the vertebrate tree of  
831 life: what is known and unknown. *Molecular Ecology*, 25(16), 3776–3800.  
832 <https://doi.org/10.1111/mec.13730>
- 833 Couch, C. E., Arnold, H. K., Crowhurst, R. S., Jolles, A. E., Sharpton, T. J., Witzak, M. F., Epps, C. W., &  
834 Beechler, B. R. (2020). Bighorn sheep gut microbiomes associate with genetic and spatial structure across  
835 a metapopulation. *Scientific Reports*, 10(1), 1–10. <https://doi.org/10.1038/s41598-020-63401-0>
- 836 Cui, Z., Holmes, A. J., Zhang, W., Dalong, H. U., Shao, Q., Wang, Z., Jiqi, L. U., & Raubenheimer, D. (2021).  
837 Seasonal diet and microbiome shifts in wild rhesus macaques are better correlated at the level of nutrient  
838 components than food items. *Integrative Zoology*, 1–15. <https://doi.org/10.1111/1749-4877.12601>
- 839 Davidson, G. L., Raulo, A., & Knowles, S. C. L. (2020). Identifying microbiome-mediated behaviour in wild  
840 vertebrates. *Trends in Ecology and Evolution*, 35(11), 972–980. <https://doi.org/10.1016/j.tree.2020.06.014>
- 841 Deagle, B. E., Thomas, A. C., McInnes, J. C., Clarke, L. J., Vesterinen, E. J., Clare, E. L., Kartzinel, T. R., &  
842 Eveson, J. P. (2019). Counting with DNA in metabarcoding studies: How should we convert sequence  
843 reads to dietary data? *Molecular Ecology*, 28(2), 391–406. <https://doi.org/10.1111/mec.14734>
- 844 Degnan, P. H., Pusey, A. E., Lonsdorf, E. V., Goodall, J., Wroblewski, E. E., Wilson, M. L., Rudicell, R. S.,  
845 Hahn, B. H., & Ochman, H. (2012). Factors associated with the diversification of the gut microbial  
846 communities within chimpanzees from Gombe National Park. *Proceedings of the National Academy of  
847 Sciences of the United States of America*, 109(32), 13034–13039. <https://doi.org/10.1073/pnas.1110994109>
- 848 Delgado-Baquerizo, M., Oliverio, A. M., Brewer, T. E., Benavent-González, A., Eldridge, D. J., Bardgett, R. D.,  
849 Maestre, F. T., Singh, B. K., & Fierer, N. (2018). A global atlas of the dominant bacteria found in soil.  
850 *Science*, 359(6373), 320–325. <https://doi.org/10.1126/science.aap9516>
- 851 DeSantis, T. Z., Hugenholtz, P., Larsen, N., Rojas, M., Brodie, E. L., Keller, K., Huber, T., Dalevi, D., Hu, P., &  
852 Andersen, G. L. (2006). Greengenes, a chimera-checked 16S rRNA gene database and workbench  
853 compatible with ARB. *Applied and Environmental Microbiology*, 72(7), 5069–5072.
- 854 Dill-McFarland, K. A., Tang, Z. Z., Kemis, J. H., Kerby, R. L., Chen, G., Palloni, A., Sorenson, T., Rey, F. E., &  
855 Herd, P. (2019). Close social relationships correlate with human gut microbiota composition. *Scientific  
856 Reports*, 9(1), 1–10. <https://doi.org/10.1038/s41598-018-37298-9>
- 857 Edgar, R. C. (2018). Updating the 97% identity threshold for 16S ribosomal RNA OTUs. *Bioinformatics*, 34(14),  
858 2371–2375. <https://doi.org/10.1093/bioinformatics/bty113>
- 859 Egea, I., Barsan, C., Bian, W., Purgatto, E., Latché, A., Chervin, C., Bouzayen, M., & Pech, J. C. (2010).  
860 Chromoplast differentiation: Current status and perspectives. *Plant and Cell Physiology*, 51(10), 1601–  
861 1611. <https://doi.org/10.1093/pcp/pcq136>
- 862 Eisenhofer, R., Minich, J. J., Marotz, C., Cooper, A., Knight, R., & Weyrich, L. S. (2019). Contamination in low  
863 microbial biomass microbiome studies: issues and recommendations. *Trends in Microbiology*, 27(2), 105–  
864 117.
- 865 Escoufier, Y. (1973). Le traitement des variables vectorielles. *Biometrics*, 29(4), 751.  
866 <https://doi.org/10.2307/2529140>
- 867 Evanno, G., Regnaut, S., & Goudet, J. (2005). Detecting the number of clusters of individuals using the software  
868 STRUCTURE: a simulation study. *Molecular Ecology*, 14(8), 2611–2620.
- 869 Falush, D., Stephens, M., & Pritchard, J. K. (2003). Inference of population structure using multilocus genotype  
870 data: linked loci and correlated allele frequencies. *Genetics*, 164(4), 1567–1587.
- 871 Ficitola, G. F., Coissac, E., Zundel, S., Riaz, T., Shehzad, W., Bessière, J., Taberlet, P., & Pompanon, F. (2010).  
872 An in silico approach for the evaluation of DNA barcodes. *BMC Genomics*, 11(1), 1–10.
- 873 Fontseré, C., Frandsen, P., Hernandez-Rodriguez, J., Niemann, J., Scharff-Olsen, C. H., Vallet, D., Le Gouar, P.,

- 874 Ménéard, N., Navarro, A., Siegismund, H. R., Hvilsom, C., Gilbert, M. T. P., Kuhlwilms, M., Hughes, D., &  
875 Marques-Bonet, T. (2021). The genetic impact of an Ebola outbreak on a wild gorilla population. *BMC*  
876 *Genomics*, 22(1). <https://doi.org/10.1186/s12864-021-08025-y>
- 877 Formenti, G., Theissinger, K., Fernandes, C., Bista, I., Bombarely, A., Bleidorn, C., Ciofi, C., Crottini, A.,  
878 Godoy, J. A., Höglund, J., Malukiewicz, J., Mouton, A., Oomen, R. A., Paez, S., Palsbøll, P. J.,  
879 Pampoulie, C., Ruiz-López, M. J., Svardal, H., Theofanopoulou, C., ... Zammit, G. (2022). The era of  
880 reference genomes in conservation genomics. *Trends in Ecology and Evolution*, 37(3), 197–202.  
881 <https://doi.org/10.1016/j.tree.2021.11.008>
- 882 Foster, Z. S. L., Sharpton, T. J., & Grünwald, N. J. (2017). Metacoder: An R package for visualization and  
883 manipulation of community taxonomic diversity data. *PLoS Computational Biology*, 13(2), e1005404.
- 884 Francis, R. M. (2017). pophelper: an R package and web app to analyse and visualize population structure.  
885 *Molecular Ecology Resources*, 17(1), 27–32.
- 886 Gloor, G. B., Macklaim, J. M., Pawlowsky-Glahn, V., & Egozcue, J. J. (2017). Microbiome datasets are  
887 compositional: and this is not optional. *Frontiers in Microbiology*, 8, 2224.
- 888 Gomez, A., Petrzalkova, K., Yeoman, C. J., Vlckova, K., Mrázek, J., Koppova, I., Carbonero, F., Ulanov, A.,  
889 Modry, D., Todd, A., Torralba, M., Nelson, K. E., Gaskins, H. R., Wilson, B., Stumpf, R. M., White, B.  
890 A., & Leigh, S. R. (2015). Gut microbiome composition and metabolomic profiles of wild western lowland  
891 gorillas (*Gorilla gorilla gorilla*) reflect host ecology. *Molecular Ecology*, 24(10), 2551–2565.  
892 <https://doi.org/10.1111/mec.13181>
- 893 Gomez, A., Rothman, J. M., Petrzalkova, K., Yeoman, C. J., Vlckova, K., Umaña, J. D., Carr, M., Modry, D.,  
894 Todd, A., Torralba, M., Nelson, K. E., Stumpf, R. M., Wilson, B. A., Blekhman, R., White, B. A., &  
895 Leigh, S. R. (2016a). Temporal variation selects for diet-microbe co-metabolic traits in the gut of *Gorilla*  
896 spp. *ISME Journal*, 10(2), 514–526. <https://doi.org/10.1038/ismej.2015.146>
- 897 Gomez, A., Rothman, J. M., Petrzalkova, K., Yeoman, C. J., Vlckova, K., Umaña, J. D., Carr, M., Modry, D.,  
898 Todd, A., Torralba, M., Nelson, K. E., Stumpf, R. M., Wilson, B. A., Blekhman, R., White, B. A., &  
899 Leigh, S. R. (2016b). Temporal variation selects for diet-microbe co-metabolic traits in the gut of *Gorilla*  
900 spp. *ISME Journal*, 10(2), 514–526. <https://doi.org/10.1038/ismej.2015.146>
- 901 Goslee, S. C., & Urban, D. L. (2007). The ecodist package for dissimilarity-based analysis of ecological data.  
902 *Journal of Statistical Software*, 22(1), 1–19.
- 903 Graczyk, T. K., & Cranfield, M. R. (2003). Coprophagy and intestinal parasites: implications to human-  
904 habituated mountain gorillas (*Gorilla gorilla beringei*) of the Virunga Mountains and Bwindi Impenetrable  
905 Forest. *Primate Conservation*, 9, 58–64.
- 906 Green, V. M., & Gabriel, K. I. (2020). Researchers' ethical concerns regarding habituating wild-nonhuman  
907 primates and perceived ethical duties to their subjects: Results of an online survey. *American Journal of*  
908 *Primatology*, 82(9). <https://doi.org/10.1002/ajp.23178>
- 909 Grieneisen, L., Dasari, M., Gould, T. J., Björk, J. R., Grenier, J. C., Yotova, V., Jansen, D., Gottel, N., Gordon,  
910 J. B., Learn, N. H., Gesquiere, L. R., Wango, T. L., Mututua, R. S., Warutere, J. K., Siodi, L., Gilbert, J.  
911 A., Barreiro, L. B., Alberts, S. C., Tung, J., ... Blekhman, R. (2021). Gut microbiome heritability is nearly  
912 universal but environmentally contingent. *Science*, 373(6551), 181–186.  
913 <https://doi.org/10.1126/science.aba5483>
- 914 Guo, N., Wu, Q., Shi, F., Niu, J., Zhang, T., Degen, A. A., Fang, Q., Ding, L., Shang, Z., Zhang, Z., & Long, R.  
915 (2021). Seasonal dynamics of diet–gut microbiota interaction in adaptation of yaks to life at high altitude.  
916 *Npj Biofilms and Microbiomes*, 7(1). <https://doi.org/10.1038/s41522-021-00207-6>
- 917 Guschanski, K., Caillaud, D., Robbins, M. M., & Vigilant, L. (2008). Females shape the genetic structure of a  
918 gorilla population. *Current Biology*, 18(22), 1809–1814. <https://doi.org/10.1016/j.cub.2008.10.031>
- 919 Harcourt, A. H., & Stewart, K. J. (2013). *Gorilla Society: Conflict, Compromise, and Cooperation Between the*  
920 *Sexes*. The University of Chicago Press. <https://doi.org/10.7208/chicago/9780226316048.001.0001>
- 921 Hibert, F., Taberlet, P., Chave, J., Scotti-Saintagne, C., Sabatier, D., & Richard-Hansen, C. (2013). Unveiling the  
922 diet of elusive rainforest herbivores in next generation sequencing era? The tapir as a case study. *PLoS*  
923 *ONE*, 8(4). <https://doi.org/10.1371/journal.pone.0060799>
- 924 Hicks, A. L., Lee, K. J., Couto-Rodriguez, M., Patel, J., Sinha, R., Guo, C., Olson, S. H., Seimon, A., Seimon, T.  
925 A., Ondzie, A. U., Karesh, W. B., Reed, P., Cameron, K. N., Lipkin, W. I., & Williams, B. L. (2018). Gut  
926 microbiomes of wild great apes fluctuate seasonally in response to diet. *Nature Communications*, 9(1).  
927 <https://doi.org/10.1038/s41467-018-04204-w>
- 928 Hird, S. M. (2017). Evolutionary biology needs wild microbiomes. *Frontiers in Microbiology*, 8(APR), 1–10.  
929 <https://doi.org/10.3389/fmicb.2017.00725>
- 930 Imani, G., Zapfack, L., Kalume, J., Riera, B., Cirimwami, L., & Boyemba, F. (2016). Woody vegetation groups  
931 and diversity along the altitudinal gradient in mountain forest: case study of Kahuzi-Biega National Park

- 932 and its surroundings, RD Congo. *Journal of Biodiversity and Environmental Sciences*, 8(6), 134–150.  
933 <http://www.innspub.net>
- 934 Jakobsson, M., & Rosenberg, N. A. (2007). CLUMPP: a cluster matching and permutation program for dealing  
935 with label switching and multimodality in analysis of population structure. *Bioinformatics*, 23(14), 1801–  
936 1806.
- 937 Jombart, T. (2008). adegenet: a R package for the multivariate analysis of genetic markers. *Bioinformatics*,  
938 24(11), 1403–1405.
- 939 Kalinowski, S. T., Taper, M. L., & Marshall, T. C. (2007). Revising how the computer program CERVUS  
940 accommodates genotyping error increases success in paternity assignment. *Molecular Ecology*, 16(5),  
941 1099–1106. <https://doi.org/10.1111/j.1365-294X.2007.03089.x>
- 942 Kalinowski, S. T., Wagner, A. P., & Taper, M. L. (2006). ML-RELATE: A computer program for maximum  
943 likelihood estimation of relatedness and relationship. *Molecular Ecology Notes*, 6(2), 576–579.  
944 <https://doi.org/10.1111/j.1471-8286.2006.01256.x>
- 945 Kambale, E. S. (2018). *Diet selection strategies of Grauer's gorillas (Gorilla beringei graueri) in relation to*  
946 *nutritional benefits and exposure to hepatotoxic phytochemicals in Mount Tshiabirimu Forest, Virunga*  
947 *National Park, DRC*. Makerere University.
- 948 Kamvar, Z. N., Tabima, J. F., & Grünwald, N. J. (2014). Poppr: an R package for genetic analysis of populations  
949 with clonal, partially clonal, and/or sexual reproduction. *PeerJ*, 2, e281.
- 950 Kandlikar, G. S., Gold, Z. J., Cowen, M. C., Meyer, R. S., Freise, A. C., Kraft, N. J. B., Moberg-Parker, J.,  
951 Sprague, J., Kushner, D. J., & Curd, E. E. (2018). ranacapa: An R package and Shiny web app to explore  
952 environmental DNA data with exploratory statistics and interactive visualizations. *F1000Research*, 7.
- 953 King, S. R. B., & Schoenecker, K. A. (2019). Comparison of methods to examine diet of feral horses from  
954 noninvasively collected fecal samples. *Rangeland Ecology and Management*, 72(4), 661–666.  
955 <https://doi.org/10.1016/j.rama.2019.02.005>
- 956 Kircher, M., Sawyer, S., & Meyer, M. (2012). Double indexing overcomes inaccuracies in multiplex sequencing  
957 on the Illumina platform. *Nucleic Acids Research*, 40(1), e3–e3.
- 958 Kopelman, N. M., Mayzel, J., Jakobsson, M., Rosenberg, N. A., & Mayrose, I. (2015). CLUMPAK: a program  
959 for identifying clustering modes and packaging population structure inferences across K. *Molecular*  
960 *Ecology Resources*, 15(5), 1179–1191.
- 961 Koskella, B., Hall, L. J., & Metcalf, C. J. E. (2017). The microbiome beyond the horizon of ecological and  
962 evolutionary theory. *Nature Ecology and Evolution*, 1(11), 1606–1615. [https://doi.org/10.1038/s41559-](https://doi.org/10.1038/s41559-017-0340-2)  
963 [017-0340-2](https://doi.org/10.1038/s41559-017-0340-2)
- 964 Lenth, R., Singmann, H., Love, J., Buerkner, P., & Herve, M. (2021). Emmeans: Estimated marginal means, aka  
965 least-squares means. *R Package Version 1.7.0*, 1(1), 3.
- 966 Lewin, H. A., Robinson, G. E., Kress, W. J., Baker, W. J., Coddington, J., Crandall, K. A., Durbin, R., Edwards,  
967 S. V., Forest, F., Gilbert, M. T. P., Goldstein, M. M., Grigoriev, I. V., Hackett, K. J., Haussler, D., Jarvis,  
968 E. D., Johnson, W. E., Patrinos, A., Richards, S., Castilla-Rubio, J. C., ... Zhang, G. (2018). Earth  
969 BioGenome Project: Sequencing life for the future of life. *Proceedings of the National Academy of*  
970 *Sciences of the United States of America*, 115(17), 4325–4333. <https://doi.org/10.1073/pnas.1720115115>
- 971 Ley, R. E., Lozupone, C. A., Hamady, M., Knight, R., & Gordon, J. I. (2008). Worlds within worlds: Evolution  
972 of the vertebrate gut microbiota. *Nature Reviews Microbiology*, 6(10), 776–788.  
973 <https://doi.org/10.1038/nrmicro1978>
- 974 Lichstein, J. W. (2007). Multiple regression on distance matrices: a multivariate spatial analysis tool. *Plant*  
975 *Ecology*, 188(2), 117–131.
- 976 Mallott, E. K., Garber, P. A., & Malhi, R. S. (2018). Trnl outperforms rbcL as a DNA metabarcoding marker  
977 when compared with the observed plant component of the diet of wild white-faced capuchins (*Cebus*  
978 *capucinus*, Primates). *PLoS ONE*, 13(6), 1–16. <https://doi.org/10.1371/journal.pone.0199556>
- 979 Matthews, J. K., Ridley, A., Kaplin, B. A., & Grueter, C. C. (2020). A comparison of fecal sampling and direct  
980 feeding observations for quantifying the diet of a frugivorous primate. *Current Zoology*, 66(4), 333–343.  
981 <https://doi.org/10.1093/CZ/ZOZ058>
- 982 McMurdie, P. J., & Holmes, S. (2013). phyloseq: an R package for reproducible interactive analysis and  
983 graphics of microbiome census data. *PLoS One*, 8(4), e61217.
- 984 McNeillage, A., Robbins, M. M., Gray, M., Olupot, W., Babaasa, D., Bitariho, R., Kasangaki, A., Rainer, H.,  
985 Asuma, S., Mugiri, G., & Baker, J. (2006). Census of the mountain gorilla *Gorilla beringei beringei*  
986 population in Bwindi Impenetrable National Park, Uganda. *ORYX*, 40(4), 419–427.  
987 <https://doi.org/10.1017/S0030605306001311>
- 988 Meirmans, P. G. (2020). genodive version 3.0: Easy-to-use software for the analysis of genetic data of diploids  
989 and polyploids. *Molecular Ecology Resources*, 20(4), 1126–1131.

- 990 Meirmans, P. G., & Hedrick, P. W. (2011). Assessing population structure: FST and related measures. *Molecular*  
991 *Ecology Resources*, 11(1), 5–18.
- 992 Meng, C., Kuster, B., Culhane, A. C., & Gholami, A. M. (2014). A multivariate approach to the integration of  
993 multi-omics datasets. *BMC Bioinformatics*, 15(1), 1–13.
- 994 Meyer, M., & Kircher, M. (2010). Illumina sequencing library preparation for highly multiplexed target capture  
995 and sequencing. *Cold Spring Harbor Protocols*, 5(6), 1–11. <https://doi.org/10.1101/pdb.prot5448>
- 996 Mirarab, S., Nguyen, N., & Warnow, T. (2012). SEPP: SATé-enabled phylogenetic placement. *Biocomputing*,  
997 247–258.
- 998 Moeller, A. H., Foerster, S., Wilson, M. L., Pusey, A. E., Hahn, B. H., & Ochman, H. (2016). Social behavior  
999 shapes the chimpanzee pan-microbiome. *Science Advances*, 2(1). <https://doi.org/10.1126/sciadv.1500997>
- 1000 Moeller, A. H., Li, Y., Ngole, E. M., Ahuka-Mundeye, S., Lonsdorf, E. V., Pusey, A. E., Peeters, M., Hahn, B.  
1001 H., & Ochman, H. (2014). Rapid changes in the gut microbiome during human evolution. *Proceedings of*  
1002 *the National Academy of Sciences of the United States of America*, 111(46), 16431–16435.  
1003 <https://doi.org/10.1073/pnas.1419136111>
- 1004 Moran, N. A., Ochman, H., & Hammer, T. J. (2019). Evolutionary and ecological consequences of gut microbial  
1005 communities. *Annual Review of Ecology, Evolution, and Systematics*, 50, 451–475.  
1006 <https://doi.org/10.1146/annurev-ecolsys-110617-062453>
- 1007 Nie, Y., Wei, F., Zhou, W., Hu, Y., Senior, A. M., Wu, Q., Yan, L., & Raubenheimer, D. (2019). Giant pandas  
1008 are macronutritional carnivores. *Current Biology*, 29(10), 1677–1682.e2.  
1009 <https://doi.org/10.1016/j.cub.2019.03.067>
- 1010 Nishida, A. H., & Ochman, H. (2019). A great-ape view of the gut microbiome. *Nature Reviews Genetics*, 20(4),  
1011 195–206. <https://doi.org/10.1038/s41576-018-0085-z>
- 1012 Oksanen, J., Blanchet, F. G., Kindt, R., Legendre, P., Minchin, P. R., O’Hara, R. B., Simpson, G. L., Solymos,  
1013 P., Henry, M., & Stevens, M. H. H. (2020). Vegan community ecology package: ordination methods,  
1014 diversity analysis and other functions for community and vegetation ecologists. *R Package Version 2.5-7*.
- 1015 Orkin, J. D., Campos, F. A., Myers, M. S., Cheves Hernandez, S. E., Guadamuz, A., & Melin, A. D. (2019).  
1016 Seasonality of the gut microbiota of free-ranging white-faced capuchins in a tropical dry forest. *ISME*  
1017 *Journal*, 13(1), 183–196. <https://doi.org/10.1038/s41396-018-0256-0>
- 1018 Palarea-Albaladejo, J., & Martín-Fernández, J. A. (2015). zCompositions—R package for multivariate  
1019 imputation of left-censored data under a compositional approach. *Chemometrics and Intelligent*  
1020 *Laboratory Systems*, 143, 85–96.
- 1021 Perofsky, A. C., Ancel Meyers, L., Abondano, L. A., Di Fiore, A., & Lewis, R. J. (2021). Social groups  
1022 constrain the spatiotemporal dynamics of wild sifaka gut microbiomes. *Molecular Ecology*, September, 1–  
1023 17. <https://doi.org/10.1111/mec.16193>
- 1024 Perofsky, A. C., Lewis, R. J., Abondano, L. A., Difiore, A., & Meyers, L. A. (2017). Hierarchical social  
1025 networks shape gut microbial composition in wild Verreaux’s sifaka. *Proceedings of the Royal Society B:*  
1026 *Biological Sciences*, 284(1868). <https://doi.org/10.1098/rspb.2017.2274>
- 1027 Plumptre, A. J., Nixon, S., Caillaud, D., Hall, J. S., Hart, J. A., Nishuli, R., & Williamson, E. A. (2016). Gorilla  
1028 beringei ssp. graueri. *The IUCN Red List of Threatened Species 2016*, e. T39995A102328430.  
1029 <https://doi.org/10.2305/IUCN.UK.2016-2.RLTS.T39995A17989838.en>
- 1030 Porras-Hurtado, L., Ruiz, Y., Santos, C., Phillips, C., Carracedo, Á., & Lareu, M. (2013). An overview of  
1031 STRUCTURE: applications, parameter settings, and supporting software. *Frontiers in Genetics*, 4, 98.
- 1032 Quast, C., Pruesse, E., Yilmaz, P., Gerken, J., Schweer, T., Yarza, P., Peplies, J., & Glöckner, F. O. (2012). The  
1033 SILVA ribosomal RNA gene database project: improved data processing and web-based tools. *Nucleic*  
1034 *Acids Research*, 41(D1), D590–D596.
- 1035 Quéméré, E., Hibert, F., Miquel, C., Lhuillier, E., Rasolondraibe, E., Champeau, J., Rabarivola, C., Nusbaumer,  
1036 L., Chatelain, C., Gautier, L., Ranirison, P., Crouau-Roy, B., Taberlet, P., & Chikhi, L. (2013). A DNA  
1037 metabarcoding study of a primate dietary diversity and plasticity across its entire fragmented range. *PLoS*  
1038 *ONE*, 8(3). <https://doi.org/10.1371/journal.pone.0058971>
- 1039 R Core Team. (2021). R: A language and environment for statistical computing. *R Foundation for Statistical*  
1040 *Computing*. <https://www.r-project.org/>
- 1041 Rahbek, C. (1995). The elevational gradient of species richness: a uniform pattern? *Ecography*, 18(2), 200–205.  
1042 <https://doi.org/10.1111/j.1600-0587.1995.tb00341.x>
- 1043 Raymann, K., Moeller, A. H., Goodman, A. L., & Ochman, H. (2017). Unexplored archaeal diversity in the great  
1044 ape gut microbiome. *MSphere*, 2(1). <https://doi.org/10.1128/msphere.00026-17>
- 1045 Raymond, M., & Rousset, F. (1995). GENEPOP (Version 1.2): Population genetics software for exact tests and  
1046 ecumenicism. *Journal of Heredity*, 86(3), 248–249. <https://doi.org/10.1093/oxfordjournals.jhered.a111573>
- 1047 Reese, A. T., Chadaideh, K. S., Diggins, C. E., Schell, L. D., Beckel, M., Callahan, P., Ryan, R., Thompson, M.

- 1048 E., & Carmody, R. N. (2021). Effects of domestication on the gut microbiota parallel those of human  
1049 industrialization. *ELife*, *10*, 1–27. <https://doi.org/10.7554/eLife.60197>
- 1050 Remis, M. J. (2000). Initial studies on the contributions of body size and gastrointestinal passage rates to dietary  
1051 flexibility among gorillas. *American Journal of Physical Anthropology*, *112*(2), 171–180.  
1052 [https://doi.org/10.1002/\(SICI\)1096-8644\(2000\)112:2<171::AID-AJPA4>3.0.CO;2-F](https://doi.org/10.1002/(SICI)1096-8644(2000)112:2<171::AID-AJPA4>3.0.CO;2-F)
- 1053 Remis, M. J., Dierenfeld, E. S., Mowry, C. B., & Carroll, R. W. (2001). Nutritional aspects of western lowland  
1054 gorilla (*Gorilla gorilla gorilla*) diet during seasons of fruit scarcity at Bai Hokou, Central African Republic.  
1055 *International Journal of Primatology*, *22*(5), 807–836. <https://doi.org/10.1023/A:1012021617737>
- 1056 Robert, P., & Escoufier, Y. (1976). A unifying tool for linear multivariate statistical methods: The RV-  
1057 coefficient. *Applied Statistics*, *25*(3), 257. <https://doi.org/10.2307/2347233>
- 1058 Rogers, M. E., Abernethy, K., Bermejo, M., Cipolletta, C., Doran, D., McFarland, K., Nishihara, T., Remis, M.,  
1059 & Tutin, C. E. G. (2004). Western gorilla diet: A synthesis from six sites. *American Journal of*  
1060 *Primatology*, *64*(2), 173–192. <https://doi.org/10.1002/ajp.20071>
- 1061 Rohland, N., Harney, E., Mallick, S., Nordenfelt, S., & Reich, D. (2015). Partial uracil – DNA – glycosylase  
1062 treatment for screening of ancient DNA. *Philosophical Transactions of the Royal Society B: Biological*  
1063 *Sciences*, *370*(1660), 1–11. <https://doi.org/10.1098/rstb.2013.0624>
- 1064 Rojas, C. A., Ramírez-Barahona, S., Holekamp, K. E., & Theis, K. R. (2021). Host phylogeny and host ecology  
1065 structure the mammalian gut microbiota at different taxonomic scales. *Animal Microbiome*, *3*(1).  
1066 <https://doi.org/10.1186/s42523-021-00094-4>
- 1067 Rosenberg, E., & Zilber-Rosenberg, I. (2016). Microbes drive evolution of animals and plants: The hologenome  
1068 concept. *MBio*, *7*(2), 1–8. <https://doi.org/10.1128/mBio.01395-15>
- 1069 Rothman, J. M., Dierenfeld, E. S., Hintz, H. F., & Pell, A. N. (2008). Nutritional quality of gorilla diets:  
1070 Consequences of age, sex, and season. *Oecologia*, *155*(1), 111–122. <https://doi.org/10.1007/s00442-007-0901-1>
- 1071 Rothman, J. M., Nkurunungi, J. B., Shannon, B. F., & Bryer, M. A. H. (2014). High altitude diets: Implications  
1072 for the feeding and nutritional ecology of mountain gorillas. In *High Altitude Primates* (pp. 247–264).  
1073 Springer New York. [https://doi.org/10.1007/978-1-4614-8175-1\\_14](https://doi.org/10.1007/978-1-4614-8175-1_14)
- 1074 Rousset, F. (2008). GENEPOP\*007: A complete re-implementation of the GENEPOP software for Windows and  
1075 Linux. *Molecular Ecology Resources*, *8*(1), 103–106. <https://doi.org/10.1111/j.1471-8286.2007.01931.x>
- 1076 Rudman, S. M., Greenblum, S., Hughes, R. C., Rajpurohit, S., Kiratli, O., Lowder, D. B., Lemmon, S. G.,  
1077 Petrov, D. A., Chaston, J. M., & Schmidt, P. (2019). Microbiome composition shapes rapid genomic  
1078 adaptation of *Drosophila melanogaster*. *Proceedings of the National Academy of Sciences of the United*  
1079 *States of America*, *116*(40), 20025–20032. <https://doi.org/10.1073/pnas.1907787116>
- 1080 Rudolph, K., Schneider, D., Fichtel, C., Daniel, R., Heistermann, M., & Kappeler, P. M. (2022). Drivers of gut  
1081 microbiome variation within and between groups of a wild Malagasy primate. *Microbiome*, *10*(1), 1–17.  
1082 <https://doi.org/10.1186/s40168-021-01223-6>
- 1083 Schaller, G. E. (1963). *The mountain gorilla: Ecology and behavior*. University of Chicago Press.
- 1084 Sharma, A. K., Petrzalkova, K., Pafco, B., Jost Robinson, C. A., Fuh, T., Wilson, B. A., Stumpf, R. M., Torralba,  
1085 M. G., Blekhan, R., White, B., Nelson, K. E., Leigh, S. R., & Gomez, A. (2020). Traditional human  
1086 populations and nonhuman primates show parallel gut microbiome adaptations to analogous ecological  
1087 conditions. *MSystems*, *5*(6). <https://doi.org/10.1128/msystems.00815-20>
- 1088 Shehzad, W., Riaz, T., Nawaz, M. A., Miquel, C., Poillot, C., Shah, S. A., Pompanon, F., Coissac, E., &  
1089 Taberlet, P. (2012). Carnivore diet analysis based on next-generation sequencing: Application to the  
1090 leopard cat (*Prionailurus bengalensis*) in Pakistan. *Molecular Ecology*, *21*(8), 1951–1965.
- 1091 Silverman, J. D., Washburne, A. D., Mukherjee, S., & David, L. A. (2017). A phylogenetic transform enhances  
1092 analysis of compositional microbiota data. *Elife*, *6*, e21887.
- 1093 Spira, C., Mitamba, G., Kirkby, A., Katembo, J., Kambale, C. K., Musikami, P., Dumbo, P., Byaombe, D.-D.,  
1094 Plumptre, A. J., & Maisels, F. (2018). *Inventaire de la biodiversité dans le Parc National de Kahuzi-*  
1095 *Biega, République Démocratique du Congo*.
- 1096 Srivathsan, A., Ang, A., Vogler, A. P., & Meier, R. (2016). Fecal metagenomics for the simultaneous assessment  
1097 of diet, parasites, and population genetics of an understudied primate. *Frontiers in Zoology*, *13*(1), 1–13.  
1098 <https://doi.org/10.1186/s12983-016-0150-4>
- 1099 Taberlet, P., Bonin, A., Zinger, L., & Coissac, E. (2018). *Environmental DNA: For biodiversity research and*  
1100 *monitoring*. Oxford University Press.
- 1101 Taberlet, P., Coissac, E., Pompanon, F., Gielly, L., Miquel, C., Valentini, A., Vermat, T., Corthier, G.,  
1102 Brochmann, C., & Willerslev, E. (2007). Power and limitations of the chloroplast trnL (UAA) intron for  
1103 plant DNA barcoding. *Nucleic Acids Research*, *35*(3), e14–e14. <https://doi.org/10.1093/nar/gkl938>
- 1104 Takenoshita, Y., & Yamagiwa, J. (2008). Estimating gorilla abundance by dung count in the northern part of  
1105



- 1106 Moukalaba-Doudou National Park, Gabon. *African Study Monographs, Suppl.* 39(April), 41–54.  
1107 <http://repository.kulib.kyoto-u.ac.jp/dspace/handle/2433/66239>
- 1108 Trevelline, B. K., & Kohl, K. D. (2022). The gut microbiome influences host diet selection behavior.  
1109 *Proceedings of the National Academy of Sciences of the United States of America*, 119(17), 1–8.  
1110 <https://doi.org/10.1073/pnas.2117537119>
- 1111 Tung, J., Barreiro, L. B., Burns, M. B., Grenier, J. C., Lynch, J., Grieneisen, L. E., Altmann, J., Alberts, S. C.,  
1112 Blekhman, R., & Archie, E. A. (2015). Social networks predict gut microbiome composition in wild  
1113 baboons. *ELife*, 2015(4), 1–18. <https://doi.org/10.7554/eLife.05224>
- 1114 Uren Webster, T. M., Consuegra, S., Hitchings, M., & de Leaniz, C. G. (2018). Interpopulation variation in the  
1115 Atlantic salmon microbiome reflects environmental and genetic diversity. *Applied and Environmental*  
1116 *Microbiology*, 84(16). <https://doi.org/10.1128/AEM.000691-18>
- 1117 Valentini, A., Pompanon, F., & Taberlet, P. (2009). DNA barcoding for ecologists. *Trends in Ecology and*  
1118 *Evolution*, 24(2), 110–117. <https://doi.org/10.1016/j.tree.2008.09.011>
- 1119 van den Boogaart, K. G., & Tolosana-Delgado, R. (2008). “Compositions”: a unified R package to analyze  
1120 compositional data. *Computers & Geosciences*, 34(4), 320–338.
- 1121 van der Hoek, Y., Binyinyi, E., Ngobobo, U., Stoinski, T. S., & Caillaud, D. (2021). Daily travel distances of  
1122 unhabituated Grauer’s gorillas (*Gorilla beringei graueri*) in a low elevation forest. *Folia Primatologica*,  
1123 92(2), 112–125. <https://doi.org/10.1159/000514626>
- 1124 van der Hoek, Y., Pazo, W. D., Binyinyi, E., Ngobobo, U., Stoinski, T. S., & Caillaud, D. (2021). Diet of  
1125 Grauer’s gorillas (*Gorilla beringei graueri*) in a low-elevation forest. *Folia Primatologica*, 92(2), 126–138.  
1126 <https://doi.org/10.1159/000515377>
- 1127 van der Valk, T., Lona Durazo, F., Dalén, L., & Guschanski, K. (2017). Whole mitochondrial genome capture  
1128 from faecal samples and museum-preserved specimens. *Molecular Ecology Resources*, 17(6), e111–e121.  
1129 <https://doi.org/10.1111/1755-0998.12699>
- 1130 van der Valk, T., Vezzi, F., Ormestad, M., Dalén, L., & Guschanski, K. (2020). Index hopping on the Illumina  
1131 HiSeqX platform and its consequences for ancient DNA studies. *Molecular Ecology Resources*, 20(5),  
1132 1171–1181. <https://doi.org/10.1111/1755-0998.13009>
- 1133 Watts, D. P. (1984). Composition and variability of mountain gorilla diets in the Central Virungas. *American*  
1134 *Journal of Primatology*, 7(4), 323–356. <https://doi.org/10.1002/ajp.1350070403>
- 1135 Weiss, S., Xu, Z. Z., Peddada, S., Amir, A., Bittinger, K., Gonzalez, A., Lozupone, C., Zaneveld, J. R., Vázquez-  
1136 Baeza, Y., & Birmingham, A. (2017). Normalization and microbial differential abundance strategies  
1137 depend upon data characteristics. *Microbiome*, 5(1), 1–18.
- 1138 West, A. G., Waite, D. W., Deines, P., Bourne, D. G., Digby, A., McKenzie, V. J., & Taylor, M. W. (2019). The  
1139 microbiome in threatened species conservation. *Biological Conservation*, 229(November 2018), 85–98.  
1140 <https://doi.org/10.1016/j.biocon.2018.11.016>
- 1141 Wikberg, E. C., Christie, D., Sicotte, P., & Ting, N. (2020). Interactions between social groups of colobus  
1142 monkeys (*Colobus vellerosus*) explain similarities in their gut microbiomes. *Animal Behaviour*, 163, 17–  
1143 31. <https://doi.org/10.1016/j.anbehav.2020.02.011>
- 1144 Yamagiwa, J., Basabose, A. K., Kaleme, K., & Yumoto, T. (2005). Diet of Grauer’s gorillas in the montane  
1145 forest of Kahuzi, Democratic Republic of Congo. *International Journal of Primatology*, 26(6), 1345–1373.  
1146 <https://doi.org/10.1007/s10764-005-8856-8>
- 1147 Yamagiwa, J., Mwanza, N., Yumoto, T., & Maruhashi, T. (1991). Ant eating by eastern lowland gorillas.  
1148 *Primates*, 32(2), 247–253. <https://doi.org/10.1007/BF02381183>
- 1149 Yamagiwa, J., Mwanza, N., Yumoto, T., & Maruhashi, T. (1994). Seasonal change in the composition of the diet  
1150 of eastern lowland gorillas. *Primates*, 35(1), 1–14. <https://doi.org/10.1007/BF02381481>
- 1151 Youngblut, N. D., Reischer, G. H., Walters, W., Schuster, N., Walzer, C., Stalder, G., Ley, R. E., & Farnleitner,  
1152 A. H. (2019). Host diet and evolutionary history explain different aspects of gut microbiome diversity  
1153 among vertebrate clades. *Nature Communications*, 10(1), 1–15. <https://doi.org/10.1038/s41467-019-10191-3>
- 1154
- 1155 Yumoto, T., Yamagiwa, J., Mwanza, N., & Maruhashi, T. (1994). List of plant species identified in Kahuzi-  
1156 Biega National Park, Zaïre. *Tropics*, 3(3/4), 295–308.
- 1157
- 1158

1159 **Data Accessibility & Benefit-Sharing Statement**

1160

1161 Data Accessibility

1162 Sequences and associated metadata for the gut microbiome and diet generated in this project have  
1163 been uploaded to the European Nucleotide Archive (ENA) under Accession no.: PRJEB49814.

1164

1165 Benefit-Sharing

1166 This research addresses a priority concern, the conservation of a critically endangered species. This  
1167 was made possible by maintaining long-term collaborations with scientists in the DRC, and all  
1168 collaborators are included as co-authors. Benefits of this research include the sharing of our data  
1169 (above) and results with the broader scientific community as well as with conservation practitioners.

1170

1171 **Author Contributions**

1172 AM, RM and KG planned the study design. AM generated dietary data and performed all analyses.  
1173 RM generated gut microbial data. PN, YL, MAG, and JS generated gorilla genotyping data. KN and  
1174 LP provided reagents and expertise for dietary analyses. NI, AP, UN, EB, RNP, DC, and KG collected  
1175 fecal samples and provided support in the field. DC, LP and KG provided project supervision. KG  
1176 supervised the experiments and data analyses. AM and KG wrote the manuscript, with contribution  
1177 from all authors. All authors reviewed and approved of the final manuscript.
